# Supplementary material for: Gene fusion of IL7 involved in the regulation of idiopathic pulmonary fibrosis
Source: PubMed Central journal article supplement — Ther Adv Respir Dis. 2021 Apr 20;15:1753466621995045. doi: 10.1177/1753466621995045 (PMC8064517; doi:10.1177/1753466621995045), 2021-04-20
Supplement: sj-pdf-5-tar-10.1177_1753466621995045.pdf [file sj-pdf-5-tar-10.1177_1753466621995045.pdf]

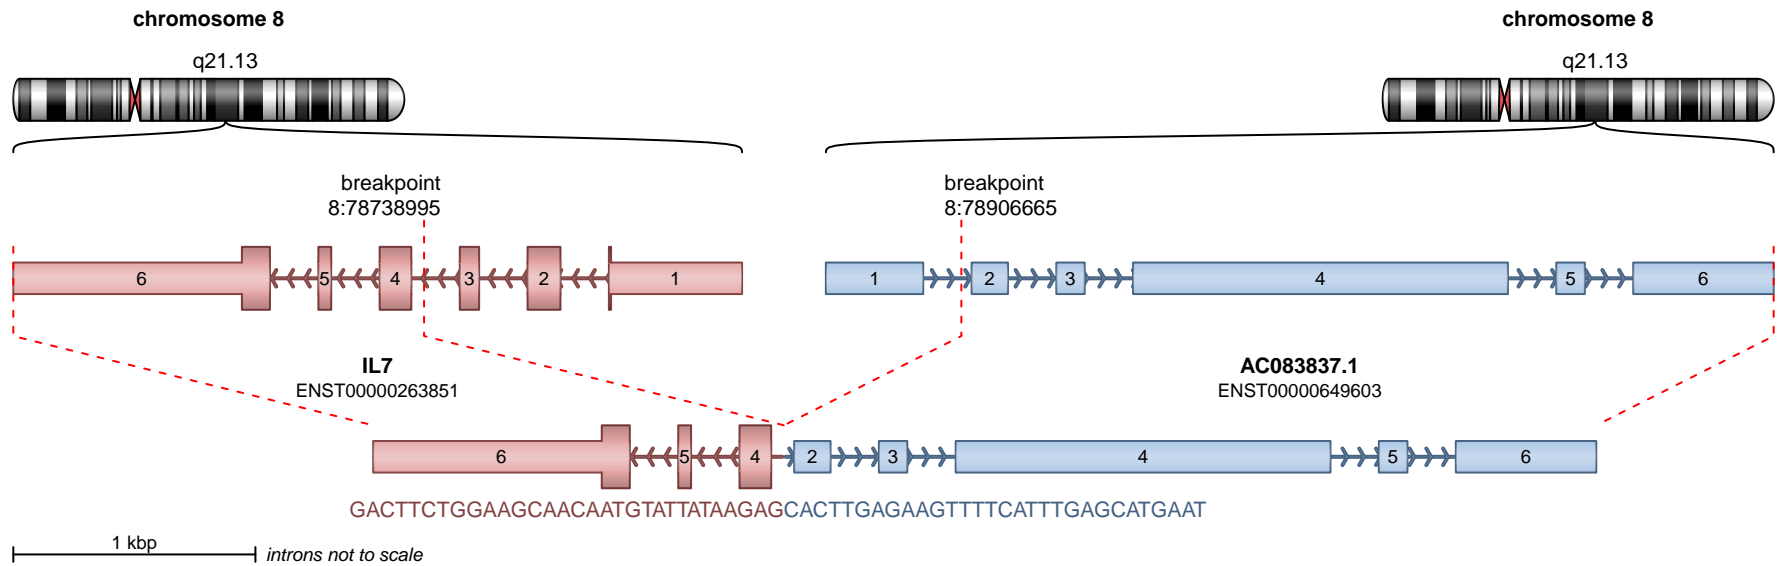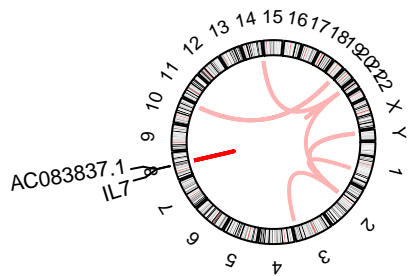

No coding regions due to antisense transcription.

**SUPPORTING READ COUNT**

Split reads in IL7 = 0

Split reads in AC083837.1 = 1

Discordant mates = 1

Sample # SRR5120911

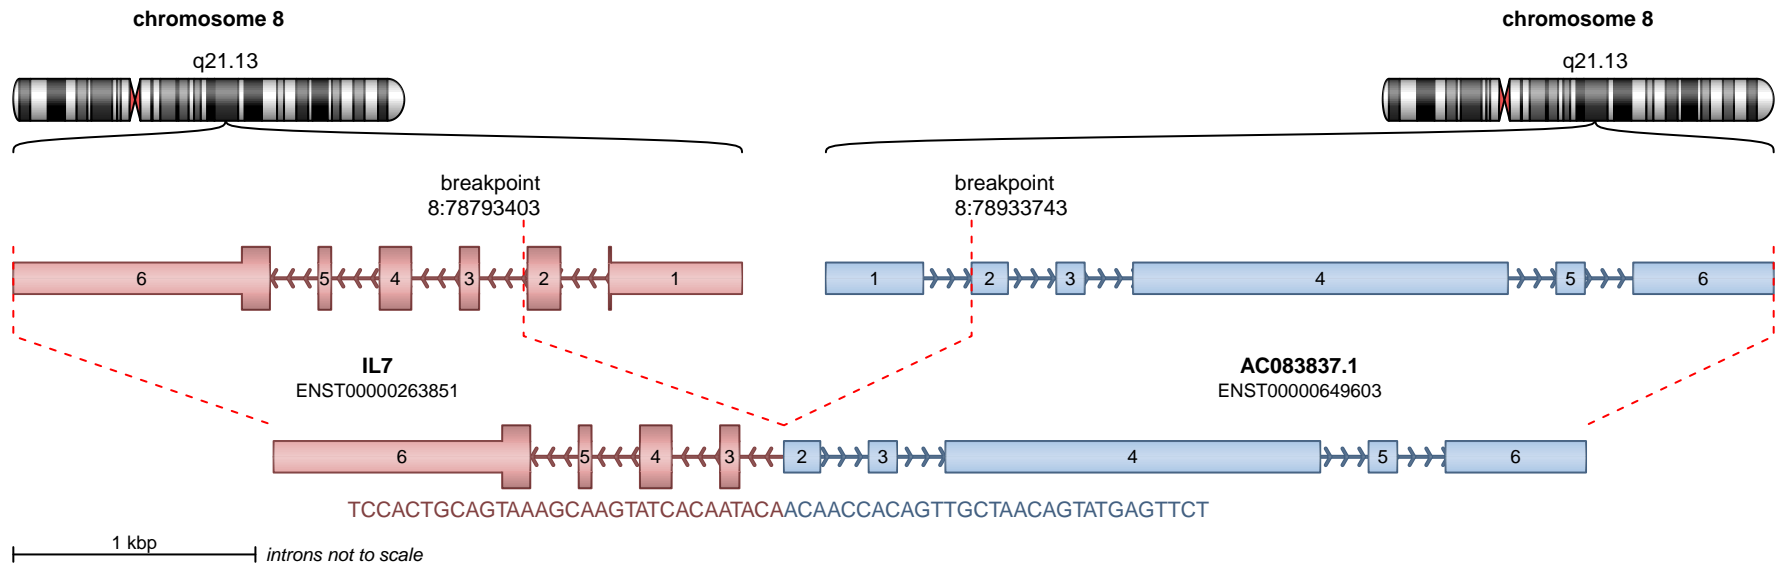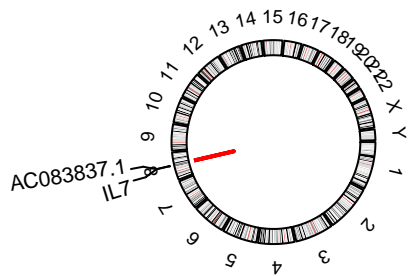

No coding regions due to antisense transcription.

**SUPPORTING READ COUNT**

Split reads in IL7 = 1  
 Split reads in AC083837.1 = 0  
 Discordant mates = 1

Sample # SRR5120918

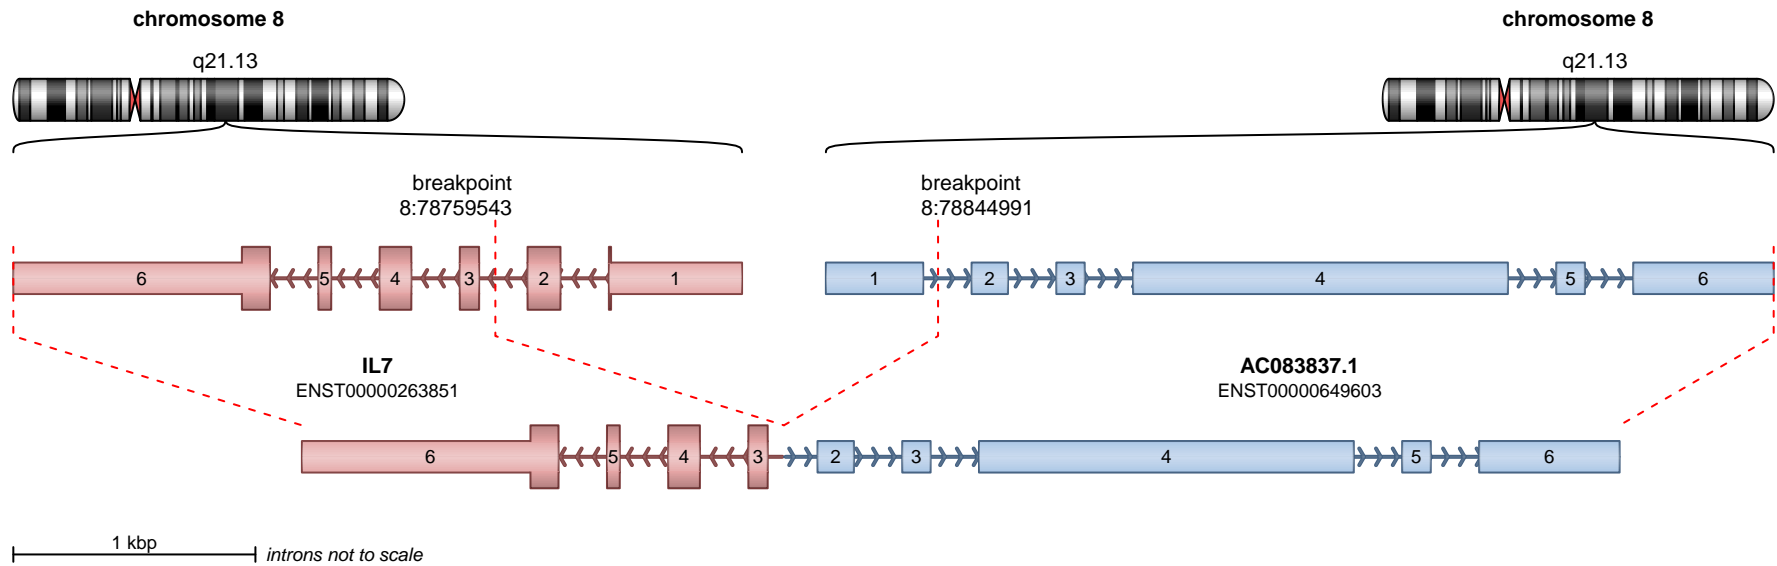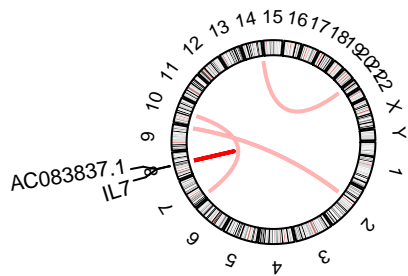

No coding regions due to antisense transcription.

**SUPPORTING READ COUNT**

Split reads in IL7 = 0  
 Split reads in AC083837.1 = 0  
 Discordant mates = 15

Sample # SRR5642422

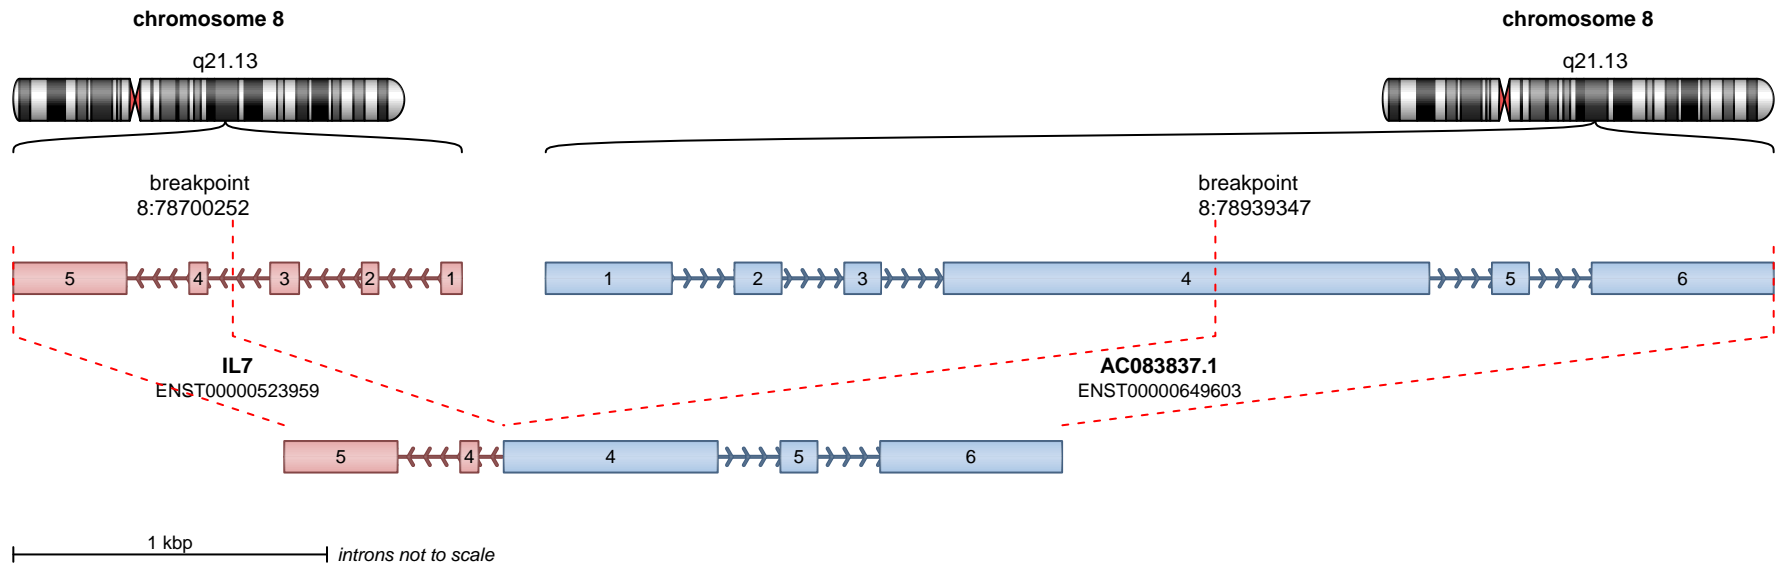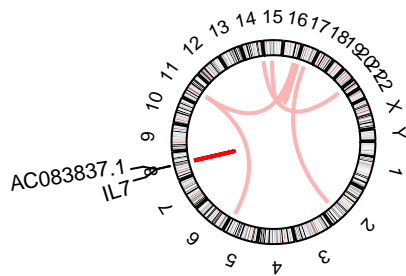

Genes are not protein-coding.

**SUPPORTING READ COUNT**

Split reads in IL7 = 0  
 Split reads in AC083837.1 = 0  
 Discordant mates = 6

Sample # SRR5642424

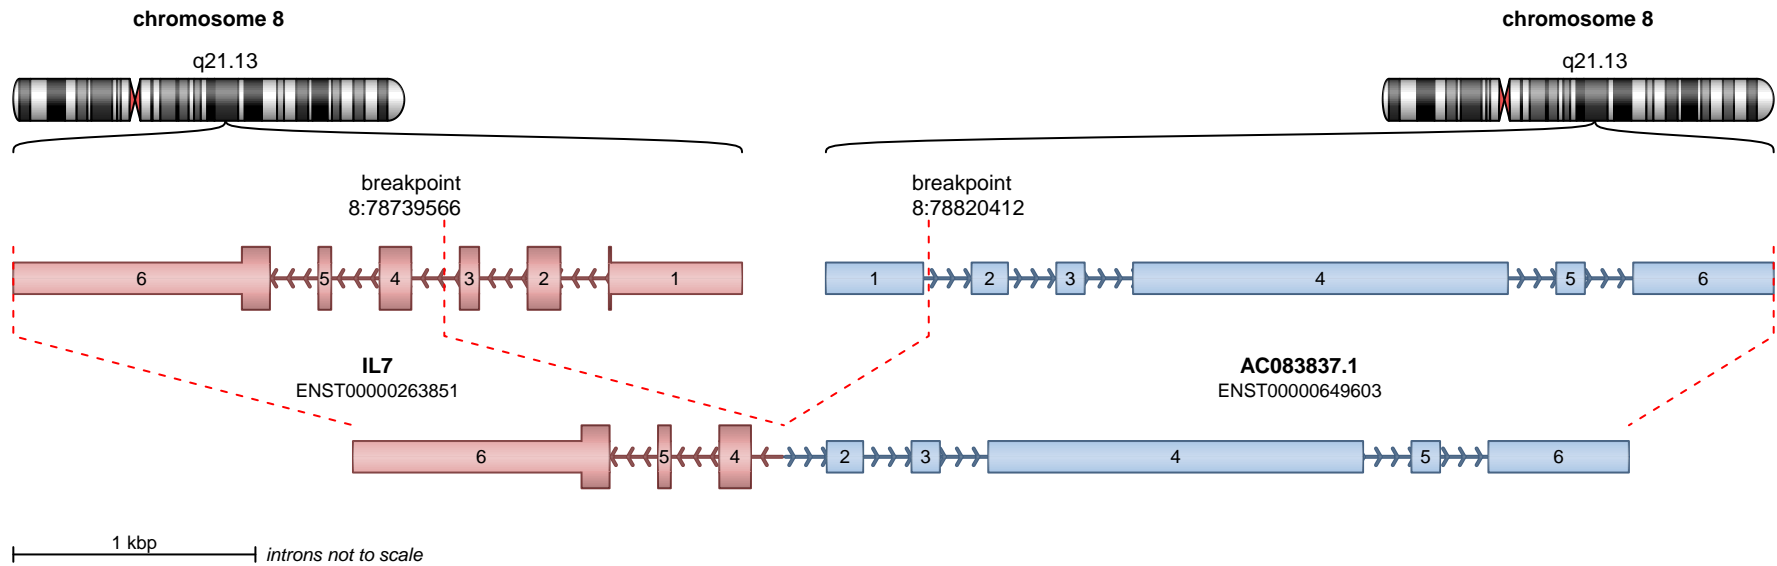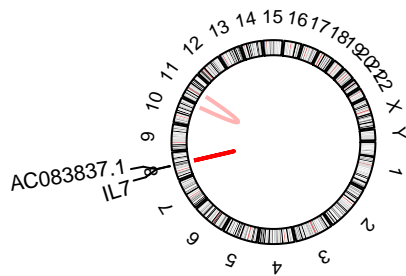

No coding regions due to antisense transcription.

**SUPPORTING READ COUNT**

Split reads in IL7 = 0  
 Split reads in AC083837.1 = 0  
 Discordant mates = 12

Sample # SRR5642427

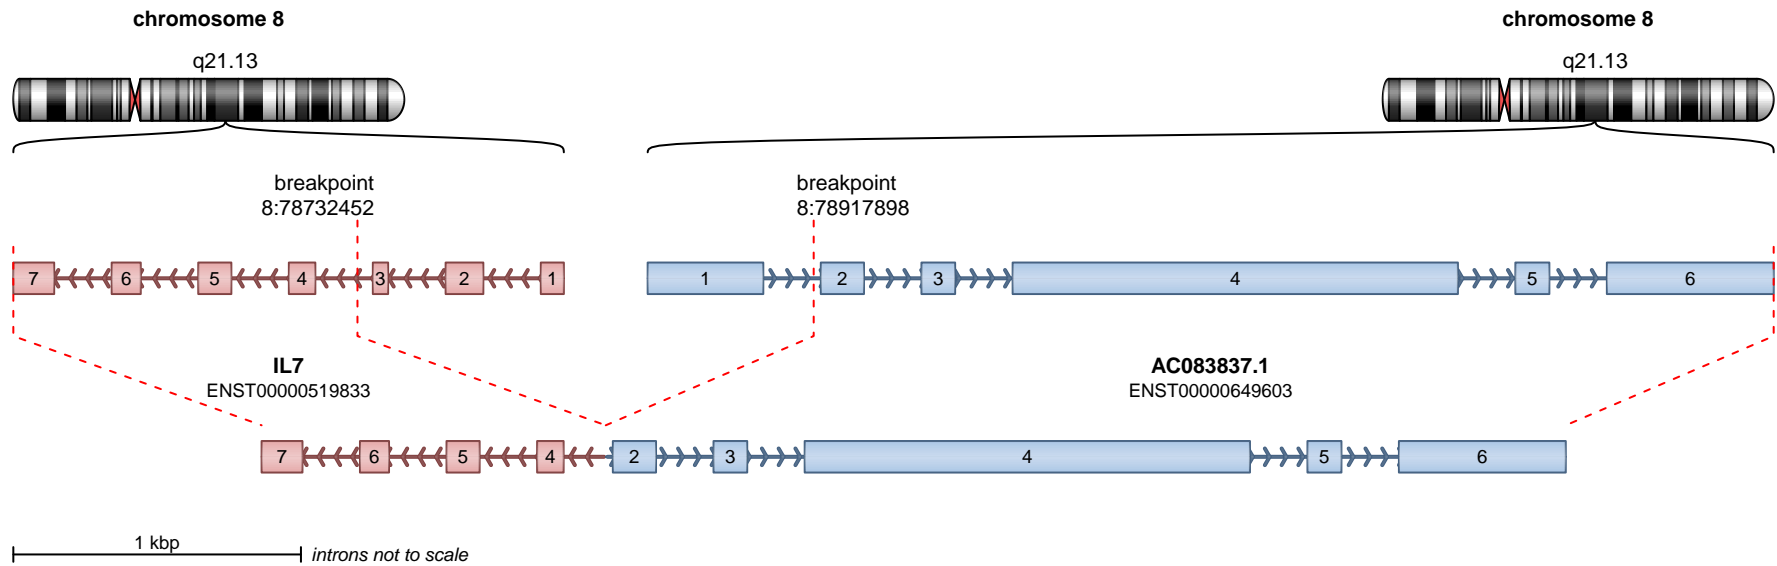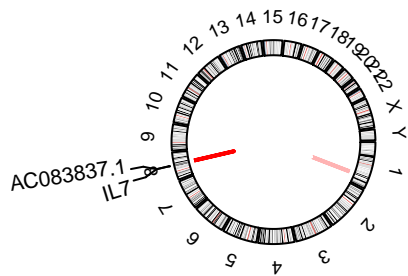

Genes are not protein-coding.

**SUPPORTING READ COUNT**

Split reads in IL7 = 0  
 Split reads in AC083837.1 = 0  
 Discordant mates = 12

Sample # SRR5642428

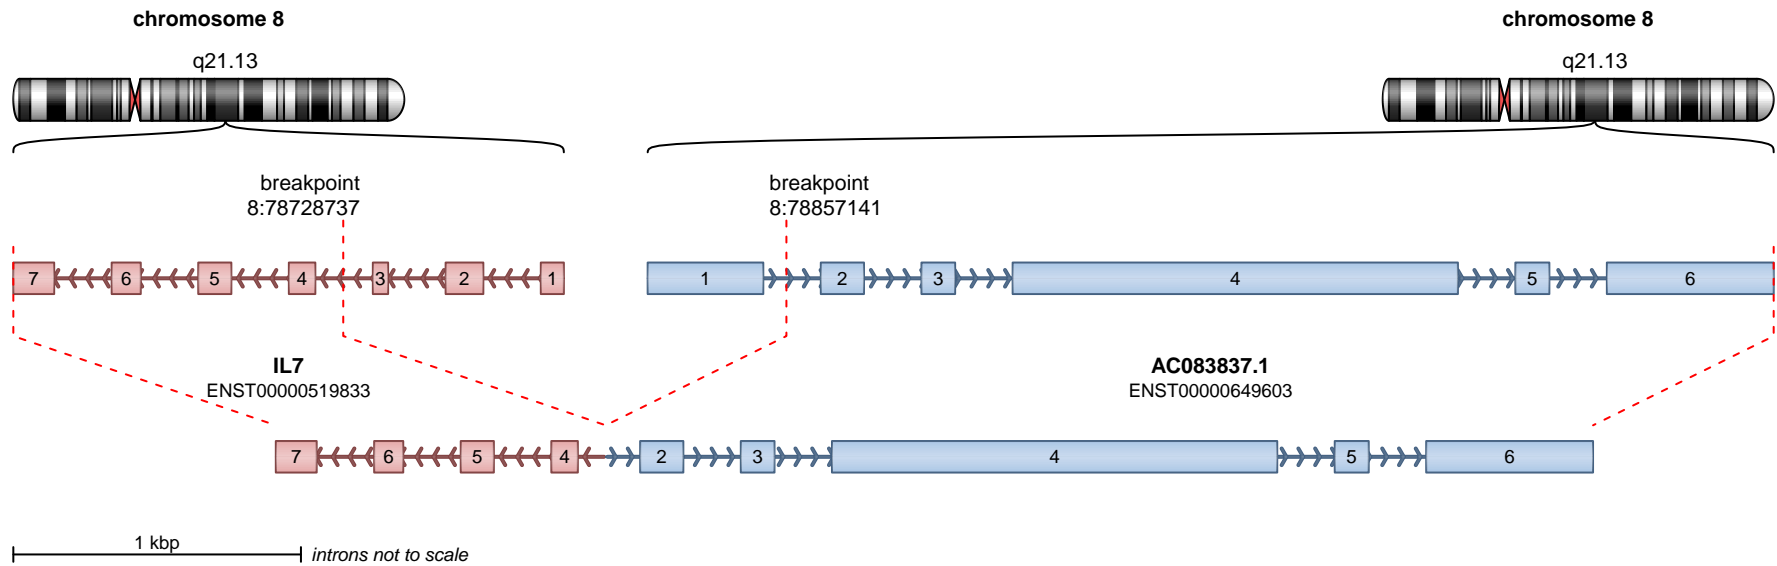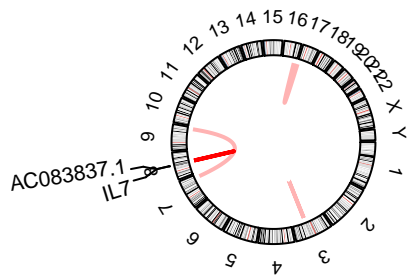

Genes are not protein-coding.

**SUPPORTING READ COUNT**

Split reads in IL7 = 0

Split reads in AC083837.1 = 0

Discordant mates = 7

Sample # SRR5642431

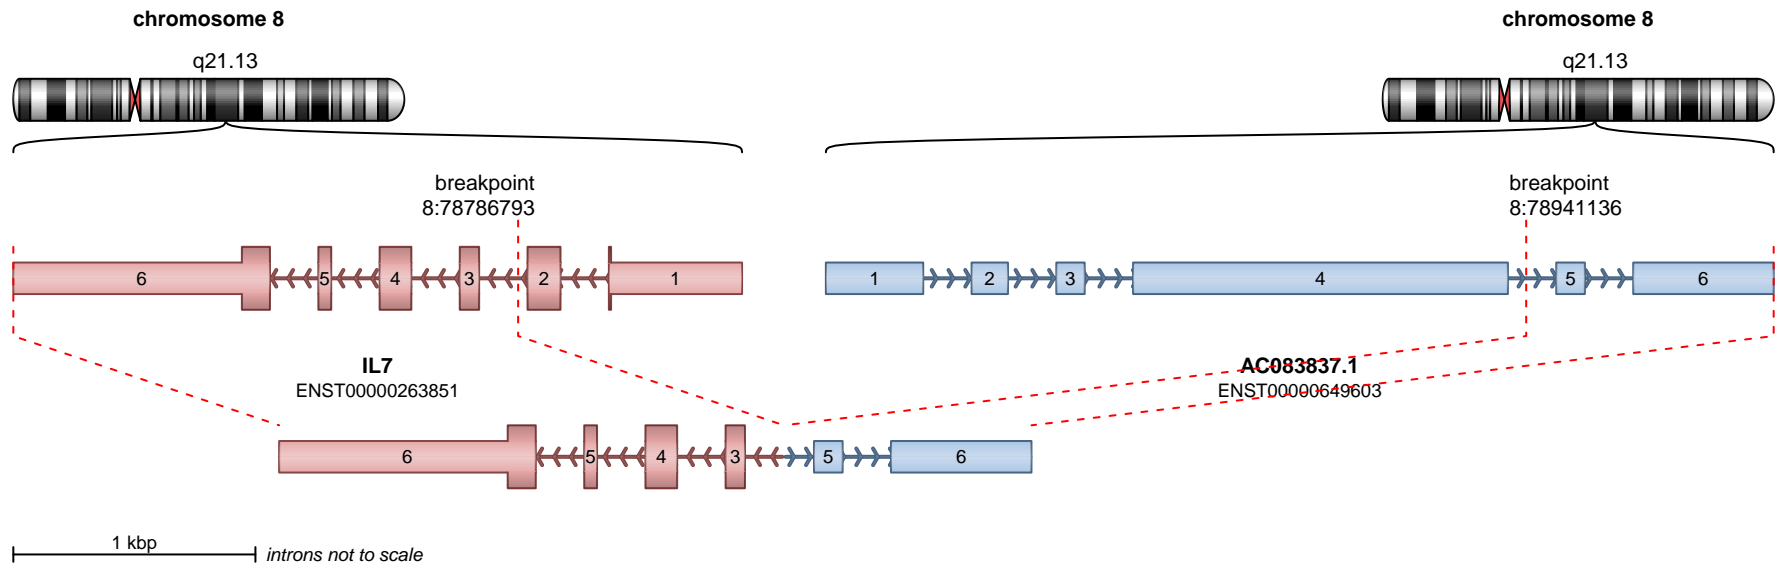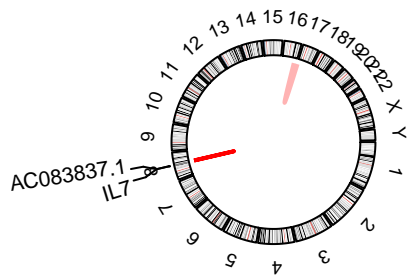

No coding regions due to antisense transcription.

**SUPPORTING READ COUNT**

Split reads in IL7 = 0  
 Split reads in AC083837.1 = 0  
 Discordant mates = 12

Sample # SRR5642434
