# Supplementary material for: Gene fusion of IL7 involved in the regulation of idiopathic pulmonary fibrosis
Source: PubMed Central journal article supplement — Ther Adv Respir Dis. 2021 Apr 20;15:1753466621995045. doi: 10.1177/1753466621995045 (PMC8064517; doi:10.1177/1753466621995045), 2021-04-20
Supplement: sj-pdf-6-tar-10.1177_1753466621995045.pdf [file sj-pdf-6-tar-10.1177_1753466621995045.pdf]

|                 | baseMean | log2FoldChange | lfcSE | stat   | pvalue   | padj |
|-----------------|----------|----------------|-------|--------|----------|------|
| LGALS7B         | 11.97    | -3.892         | 0.906 | -4.294 | 1.75E-05 | 1    |
| IL1R2           | 207.90   | -2.421         | 0.611 | -3.963 | 7.41E-05 | 1    |
| TFCP2L1         | 391.84   | -1.321         | 0.346 | -3.818 | 1.35E-04 | 1    |
| ACTA1           | 5.95     | 1.768          | 0.463 | 3.814  | 1.37E-04 | 1    |
| AL109918.1      | 56.64    | 0.786          | 0.207 | 3.797  | 1.47E-04 | 1    |
| PRAME           | 2.90     | 3.032          | 0.799 | 3.792  | 1.49E-04 | 1    |
| AC134879.2      | 2.52     | 2.771          | 0.744 | 3.725  | 1.96E-04 | 1    |
| BMPR1APS1       | 4.71     | -2.354         | 0.662 | -3.555 | 3.77E-04 | 1    |
| UQCRHL          | 36.95    | -0.638         | 0.179 | -3.553 | 3.81E-04 | 1    |
| AC011455.1      | 3.90     | 1.380          | 0.396 | 3.488  | 4.87E-04 | 1    |
| HDAC5           | 439.10   | 0.487          | 0.140 | 3.472  | 5.17E-04 | 1    |
| PGM5P4-AS1      | 9.57     | 0.832          | 0.241 | 3.456  | 5.49E-04 | 1    |
| KLHL2           | 331.46   | -0.469         | 0.136 | -3.445 | 5.70E-04 | 1    |
| ACTC1           | 11.99    | 1.979          | 0.578 | 3.422  | 6.22E-04 | 1    |
| AL079342.3      | 2.96     | -2.026         | 0.596 | -3.399 | 6.78E-04 | 1    |
| NOV             | 89.29    | 1.195          | 0.357 | 3.351  | 8.05E-04 | 1    |
| AP001107.5      | 4.62     | 1.303          | 0.394 | 3.305  | 9.50E-04 | 1    |
| PI16            | 84.79    | 1.814          | 0.551 | 3.294  | 9.86E-04 | 1    |
| KLHL14          | 15.01    | 1.414          | 0.429 | 3.294  | 9.88E-04 | 1    |
| ENSG00000287455 | 5.81     | -1.992         | 0.605 | -3.291 | 9.97E-04 | 1    |
| PPP1R12B        | 1800.24  | 0.592          | 0.180 | 3.288  | 1.01E-03 | 1    |
| AL158156.1      | 1.52     | -2.893         | 0.882 | -3.279 | 1.04E-03 | 1    |
| ARMCX1          | 198.05   | 0.368          | 0.113 | 3.265  | 1.09E-03 | 1    |
| MYOC            | 39.08    | 1.637          | 0.505 | 3.244  | 1.18E-03 | 1    |
| FHL1            | 3006.35  | 0.621          | 0.191 | 3.244  | 1.18E-03 | 1    |
| AL591368.1      | 1.57     | 2.126          | 0.656 | 3.243  | 1.18E-03 | 1    |
| OGN             | 416.10   | 1.052          | 0.326 | 3.224  | 1.26E-03 | 1    |
| SLC1A3          | 341.37   | -1.043         | 0.324 | -3.218 | 1.29E-03 | 1    |
| ENSG00000285569 | 12.43    | -0.982         | 0.307 | -3.196 | 1.39E-03 | 1    |
| AC236972.3      | 20.05    | -1.544         | 0.483 | -3.194 | 1.40E-03 | 1    |
| TRBV8-2         | 0.80     | 2.890          | 0.909 | 3.180  | 1.47E-03 | 1    |
| NXPB3           | 74.63    | 0.920          | 0.291 | 3.165  | 1.55E-03 | 1    |
| AC103858.1      | 29.93    | 0.557          | 0.177 | 3.151  | 1.63E-03 | 1    |
| BRIP1           | 43.83    | -1.024         | 0.325 | -3.147 | 1.65E-03 | 1    |
| LINC02084       | 7.18     | 1.070          | 0.340 | 3.145  | 1.66E-03 | 1    |
| IGLJ7           | 4.75     | 2.465          | 0.784 | 3.142  | 1.68E-03 | 1    |
| SLC44A5         | 24.93    | -1.711         | 0.548 | -3.124 | 1.78E-03 | 1    |
| B4GAT1          | 179.49   | 0.489          | 0.157 | 3.124  | 1.79E-03 | 1    |
| TBC1D9          | 559.64   | 0.330          | 0.106 | 3.122  | 1.80E-03 | 1    |
| AL049767.1      | 3.69     | -2.660         | 0.852 | -3.121 | 1.80E-03 | 1    |
| LINC00310       | 12.68    | 0.983          | 0.315 | 3.121  | 1.80E-03 | 1    |
| AL513318.2      | 5.37     | 1.258          | 0.404 | 3.116  | 1.83E-03 | 1    |
| AL807757.2      | 9.63     | -1.076         | 0.345 | -3.114 | 1.84E-03 | 1    |
| CR382285.1      | 7.31     | -1.855         | 0.597 | -3.110 | 1.87E-03 | 1    |
| LTC4S           | 44.54    | 1.069          | 0.346 | 3.094  | 1.98E-03 | 1    |
| AC119751.5      | 3.41     | -1.840         | 0.596 | -3.089 | 2.01E-03 | 1    |
| AC003682.1      | 2.34     | 1.307          | 0.424 | 3.081  | 2.06E-03 | 1    |
| LNP1            | 49.27    | 0.504          | 0.164 | 3.070  | 2.14E-03 | 1    |
| OPTN            | 873.91   | 0.379          | 0.123 | 3.069  | 2.15E-03 | 1    |
| RGS3            | 499.54   | 0.623          | 0.203 | 3.066  | 2.17E-03 | 1    |
| CYP1A1          | 51.57    | -3.670         | 1.205 | -3.047 | 2.32E-03 | 1    |
| CDK5R1          | 23.83    | -0.770         | 0.253 | -3.045 | 2.33E-03 | 1    |
| USHBP1          | 101.03   | 0.867          | 0.286 | 3.035  | 2.40E-03 | 1    |
| PEX11G          | 30.15    | 0.604          | 0.199 | 3.029  | 2.46E-03 | 1    |
| MAPK3           | 361.12   | 0.394          | 0.130 | 3.026  | 2.48E-03 | 1    |
| NCALD           | 431.27   | 0.518          | 0.172 | 3.019  | 2.54E-03 | 1    |
| LINC02207       | 22.35    | -1.373         | 0.455 | -3.015 | 2.57E-03 | 1    |
| GUCY2D          | 12.89    | -0.976         | 0.324 | -3.013 | 2.58E-03 | 1    |
| MIR4802         | 3.83     | -2.398         | 0.798 | -3.004 | 2.66E-03 | 1    |

|                 | baseMean | log2FoldChange | lfcSE | stat   | pvalue   | padj |
|-----------------|----------|----------------|-------|--------|----------|------|
| ZCCHC12         | 9.36     | -2.164         | 0.721 | -3.002 | 2.68E-03 | 1    |
| AP000426.1      | 36.69    | 0.613          | 0.205 | 2.989  | 2.79E-03 | 1    |
| CCDC144CP       | 20.41    | -0.847         | 0.283 | -2.989 | 2.80E-03 | 1    |
| CNR1            | 141.86   | -0.943         | 0.316 | -2.984 | 2.85E-03 | 1    |
| ENSG00000286042 | 4.68     | -2.467         | 0.828 | -2.980 | 2.88E-03 | 1    |
| PKIG            | 698.02   | 0.455          | 0.153 | 2.975  | 2.93E-03 | 1    |
| AC002546.1      | 2.48     | -3.040         | 1.023 | -2.972 | 2.96E-03 | 1    |
| CYS1            | 62.34    | 1.155          | 0.389 | 2.968  | 3.00E-03 | 1    |
| ACSL1           | 1787.32  | -0.826         | 0.278 | -2.965 | 3.02E-03 | 1    |
| ENSG00000285851 | 41.25    | -0.478         | 0.162 | -2.959 | 3.09E-03 | 1    |
| AL365199.1      | 1.65     | 1.732          | 0.586 | 2.956  | 3.11E-03 | 1    |
| RF00554         | 3.14     | -1.649         | 0.559 | -2.950 | 3.18E-03 | 1    |
| PRSS35          | 16.34    | 0.915          | 0.310 | 2.948  | 3.20E-03 | 1    |
| KLHL10          | 4.86     | -1.339         | 0.454 | -2.947 | 3.21E-03 | 1    |
| CSMD2           | 34.86    | -1.147         | 0.390 | -2.941 | 3.27E-03 | 1    |
| PHGDH           | 158.95   | 0.826          | 0.281 | 2.941  | 3.27E-03 | 1    |
| TNFSF10         | 1389.23  | 0.738          | 0.251 | 2.941  | 3.28E-03 | 1    |
| PALB2           | 127.60   | -0.432         | 0.147 | -2.940 | 3.28E-03 | 1    |
| TMIGD3          | 31.22    | -1.247         | 0.425 | -2.933 | 3.35E-03 | 1    |
| ZBTB43          | 393.00   | -0.301         | 0.103 | -2.925 | 3.45E-03 | 1    |
| FKBP5           | 1860.47  | -1.438         | 0.492 | -2.922 | 3.48E-03 | 1    |
| AC084871.1      | 16.45    | -1.859         | 0.636 | -2.921 | 3.49E-03 | 1    |
| AL513327.1      | 43.97    | -0.787         | 0.270 | -2.920 | 3.50E-03 | 1    |
| CYP26B1         | 51.14    | 1.224          | 0.420 | 2.915  | 3.56E-03 | 1    |
| TUBA8           | 5.41     | -1.205         | 0.415 | -2.908 | 3.64E-03 | 1    |
| AC112250.2      | 4.32     | -1.461         | 0.503 | -2.907 | 3.65E-03 | 1    |
| CD247           | 91.82    | 0.847          | 0.292 | 2.906  | 3.66E-03 | 1    |
| NRN1            | 134.81   | 0.606          | 0.209 | 2.904  | 3.68E-03 | 1    |
| NDST4           | 4.31     | -1.897         | 0.654 | -2.902 | 3.71E-03 | 1    |
| AC008972.2      | 5.12     | -1.400         | 0.483 | -2.896 | 3.78E-03 | 1    |
| SLC7A11-AS1     | 8.19     | -1.430         | 0.494 | -2.894 | 3.81E-03 | 1    |
| PRF1            | 190.77   | 1.010          | 0.349 | 2.893  | 3.81E-03 | 1    |
| WDR7            | 371.71   | -0.292         | 0.101 | -2.892 | 3.83E-03 | 1    |
| RF00012         | 19.76    | -2.638         | 0.913 | -2.890 | 3.86E-03 | 1    |
| AL596223.2      | 4.18     | -1.140         | 0.395 | -2.884 | 3.92E-03 | 1    |
| STXBPS-AS1      | 37.45    | -0.590         | 0.205 | -2.883 | 3.93E-03 | 1    |
| AASS            | 853.36   | -0.527         | 0.183 | -2.881 | 3.96E-03 | 1    |
| SNORD6          | 5.90     | -1.369         | 0.476 | -2.875 | 4.04E-03 | 1    |
| ACTBL2          | 7.66     | -1.442         | 0.503 | -2.870 | 4.10E-03 | 1    |
| HSPD1P11        | 20.98    | -0.858         | 0.299 | -2.869 | 4.12E-03 | 1    |
| LINC02217       | 5.15     | -1.960         | 0.683 | -2.869 | 4.12E-03 | 1    |
| ZBTB16          | 680.49   | -1.535         | 0.535 | -2.867 | 4.14E-03 | 1    |
| CCDC150         | 32.31    | -0.741         | 0.259 | -2.864 | 4.18E-03 | 1    |
| HSD17B8         | 74.26    | 0.453          | 0.158 | 2.861  | 4.23E-03 | 1    |
| LINC02361       | 7.56     | 0.883          | 0.309 | 2.858  | 4.26E-03 | 1    |
| DAAM1           | 771.46   | 0.359          | 0.126 | 2.855  | 4.31E-03 | 1    |
| FAM180B         | 3.07     | 1.515          | 0.531 | 2.854  | 4.32E-03 | 1    |
| NMUR1           | 46.35    | 1.024          | 0.359 | 2.853  | 4.32E-03 | 1    |
| ROS1            | 1426.93  | -0.733         | 0.257 | -2.851 | 4.35E-03 | 1    |
| AC084871.2      | 19.22    | -1.448         | 0.508 | -2.851 | 4.36E-03 | 1    |
| UBE2V1P1        | 5.42     | -1.236         | 0.434 | -2.848 | 4.40E-03 | 1    |
| AOX3P           | 6.76     | -1.595         | 0.560 | -2.847 | 4.41E-03 | 1    |
| TMEM128         | 223.74   | 0.251          | 0.088 | 2.841  | 4.50E-03 | 1    |
| AZGP1           | 160.60   | -1.331         | 0.468 | -2.840 | 4.51E-03 | 1    |
| TRIM39          | 126.43   | 0.298          | 0.105 | 2.837  | 4.56E-03 | 1    |
| PIN1            | 235.93   | 0.376          | 0.133 | 2.832  | 4.62E-03 | 1    |
| ID4             | 627.71   | 0.591          | 0.209 | 2.824  | 4.74E-03 | 1    |
| ENSG00000286965 | 15.60    | -0.932         | 0.330 | -2.822 | 4.78E-03 | 1    |
| AL450472.2      | 0.73     | 3.731          | 1.323 | 2.821  | 4.79E-03 | 1    |

|            | baseMean | log2FoldChange | lfcSE | stat   | pvalue   | padj |
|------------|----------|----------------|-------|--------|----------|------|
| MTBP       | 89.45    | -0.490         | 0.174 | -2.821 | 4.79E-03 | 1    |
| RAMP2      | 432.55   | 0.813          | 0.288 | 2.817  | 4.85E-03 | 1    |
| CD27-AS1   | 230.05   | 0.429          | 0.152 | 2.816  | 4.86E-03 | 1    |
| ADAMDEC1   | 33.81    | -1.456         | 0.517 | -2.815 | 4.88E-03 | 1    |
| TAPBPL     | 291.14   | 0.423          | 0.150 | 2.811  | 4.94E-03 | 1    |
| MIR663AHG  | 13.40    | -0.911         | 0.324 | -2.809 | 4.96E-03 | 1    |
| CCDC144NL  | 3.59     | -2.298         | 0.819 | -2.807 | 5.00E-03 | 1    |
| MYO7A      | 82.52    | -0.601         | 0.214 | -2.807 | 5.01E-03 | 1    |
| GCGR       | 1.78     | -2.577         | 0.918 | -2.806 | 5.02E-03 | 1    |
| TBCB       | 261.78   | 0.312          | 0.111 | 2.806  | 5.02E-03 | 1    |
| GIMAP6     | 573.56   | 0.558          | 0.199 | 2.804  | 5.05E-03 | 1    |
| HS6ST3     | 8.72     | -1.253         | 0.447 | -2.802 | 5.08E-03 | 1    |
| WNK3       | 39.42    | -0.737         | 0.263 | -2.800 | 5.10E-03 | 1    |
| ABCC8      | 45.69    | -1.336         | 0.477 | -2.800 | 5.11E-03 | 1    |
| AL109809.1 | 3.55     | -2.219         | 0.794 | -2.797 | 5.17E-03 | 1    |
| MTATP8P2   | 1.35     | -2.535         | 0.907 | -2.795 | 5.19E-03 | 1    |
| AL359265.3 | 6.67     | -1.004         | 0.359 | -2.794 | 5.21E-03 | 1    |
| C12orf43   | 157.10   | 0.215          | 0.077 | 2.792  | 5.23E-03 | 1    |
| AC011726.2 | 3.65     | -1.856         | 0.665 | -2.791 | 5.25E-03 | 1    |
| LINC02196  | 4.28     | -1.755         | 0.629 | -2.789 | 5.29E-03 | 1    |
| RAMP2-AS1  | 130.19   | 0.730          | 0.262 | 2.783  | 5.38E-03 | 1    |
| AC135457.1 | 432.88   | 0.244          | 0.088 | 2.782  | 5.40E-03 | 1    |
| AL049873.2 | 1.85     | 1.391          | 0.500 | 2.780  | 5.44E-03 | 1    |
| SHBG       | 4.27     | -1.348         | 0.485 | -2.777 | 5.49E-03 | 1    |
| AL353743.3 | 3.78     | -1.567         | 0.565 | -2.773 | 5.55E-03 | 1    |
| AL078599.2 | 4.66     | -2.037         | 0.735 | -2.771 | 5.59E-03 | 1    |
| AC106795.2 | 9.63     | -1.312         | 0.474 | -2.770 | 5.60E-03 | 1    |
| TCP10L2    | 2.30     | -2.211         | 0.798 | -2.769 | 5.62E-03 | 1    |
| APOBEC3G   | 200.85   | 0.540          | 0.195 | 2.768  | 5.65E-03 | 1    |
| MEN1       | 143.14   | -0.455         | 0.165 | -2.766 | 5.67E-03 | 1    |
| LINC00924  | 22.95    | 0.772          | 0.279 | 2.765  | 5.70E-03 | 1    |
| CST6       | 83.38    | 0.885          | 0.320 | 2.763  | 5.72E-03 | 1    |
| PARP4P2    | 3.53     | -1.673         | 0.605 | -2.763 | 5.73E-03 | 1    |
| HSPB9      | 3.50     | -1.508         | 0.547 | -2.759 | 5.80E-03 | 1    |
| AC245595.1 | 10.57    | 0.864          | 0.313 | 2.757  | 5.83E-03 | 1    |
| MIR2355    | 3.21     | 1.721          | 0.624 | 2.757  | 5.84E-03 | 1    |
| AL358075.1 | 7.23     | -0.924         | 0.336 | -2.755 | 5.88E-03 | 1    |
| FANCD2OS   | 9.68     | -0.841         | 0.305 | -2.755 | 5.88E-03 | 1    |
| AC008063.1 | 20.79    | -0.901         | 0.327 | -2.754 | 5.88E-03 | 1    |
| ADAMTS7P3  | 259.44   | 1.436          | 0.521 | 2.754  | 5.89E-03 | 1    |
| TERB1      | 8.04     | -1.303         | 0.473 | -2.752 | 5.92E-03 | 1    |
| CEP170P1   | 12.97    | -1.097         | 0.399 | -2.752 | 5.92E-03 | 1    |
| KIF5C      | 32.97    | -0.802         | 0.292 | -2.750 | 5.96E-03 | 1    |
| PIP4P2     | 114.86   | 0.361          | 0.131 | 2.749  | 5.98E-03 | 1    |
| CLEC4E     | 98.98    | -1.157         | 0.421 | -2.748 | 6.00E-03 | 1    |
| MRPL42P6   | 4.23     | -1.960         | 0.714 | -2.745 | 6.05E-03 | 1    |
| SRSF9P1    | 1.78     | -1.829         | 0.666 | -2.744 | 6.07E-03 | 1    |
| LINC02280  | 2.67     | -2.144         | 0.782 | -2.743 | 6.09E-03 | 1    |
| SCIN       | 189.98   | -0.722         | 0.264 | -2.739 | 6.16E-03 | 1    |
| UBAP2      | 365.49   | -0.228         | 0.083 | -2.737 | 6.19E-03 | 1    |
| MAGOH3P    | 2.52     | -1.476         | 0.539 | -2.736 | 6.22E-03 | 1    |
| CAVIN3     | 174.44   | 0.591          | 0.216 | 2.736  | 6.23E-03 | 1    |
| CPTP       | 93.68    | 0.601          | 0.220 | 2.732  | 6.29E-03 | 1    |
| ANKRD55    | 10.15    | -0.846         | 0.310 | -2.731 | 6.32E-03 | 1    |
| LINC02080  | 4.70     | -2.149         | 0.788 | -2.729 | 6.35E-03 | 1    |
| LINC02555  | 33.35    | -1.106         | 0.406 | -2.726 | 6.41E-03 | 1    |
| AC068790.6 | 4.20     | 1.197          | 0.439 | 2.725  | 6.42E-03 | 1    |
| AC087752.3 | 12.86    | 1.043          | 0.383 | 2.725  | 6.43E-03 | 1    |
| ATP6V0A2   | 325.32   | -0.255         | 0.094 | -2.723 | 6.47E-03 | 1    |

|                 | baseMean | log2FoldChange | lfcSE | stat   | pvalue   | padj |
|-----------------|----------|----------------|-------|--------|----------|------|
| AC007920.2      | 9.00     | 0.914          | 0.336 | 2.721  | 6.51E-03 | 1    |
| OR13E1P         | 2.02     | 1.342          | 0.494 | 2.716  | 6.60E-03 | 1    |
| TP53INP1        | 1007.16  | 0.471          | 0.174 | 2.714  | 6.65E-03 | 1    |
| IGLV1-51        | 287.56   | 1.668          | 0.615 | 2.713  | 6.66E-03 | 1    |
| IRF4            | 187.87   | 0.890          | 0.328 | 2.713  | 6.67E-03 | 1    |
| LINC02475       | 2.25     | -2.366         | 0.873 | -2.709 | 6.74E-03 | 1    |
| CCSER1          | 62.14    | -0.597         | 0.220 | -2.709 | 6.76E-03 | 1    |
| PSEN2           | 165.92   | 0.295          | 0.109 | 2.708  | 6.77E-03 | 1    |
| ACRV1           | 2.12     | -2.034         | 0.752 | -2.707 | 6.80E-03 | 1    |
| HLA-E           | 12675.49 | 0.565          | 0.209 | 2.706  | 6.81E-03 | 1    |
| MYH10           | 2925.34  | 0.682          | 0.253 | 2.701  | 6.90E-03 | 1    |
| ENSG00000286677 | 2.33     | -1.692         | 0.627 | -2.700 | 6.93E-03 | 1    |
| CHIA            | 49.62    | -1.447         | 0.536 | -2.699 | 6.95E-03 | 1    |
| ARRDC2          | 553.40   | -0.652         | 0.242 | -2.699 | 6.95E-03 | 1    |
| LINC02213       | 2.50     | -1.872         | 0.695 | -2.693 | 7.07E-03 | 1    |
| XDH             | 23.11    | -0.870         | 0.323 | -2.693 | 7.08E-03 | 1    |
| AC016405.2      | 0.64     | 1.875          | 0.696 | 2.693  | 7.09E-03 | 1    |
| FHIT            | 88.32    | -0.373         | 0.139 | -2.692 | 7.09E-03 | 1    |
| SDC2            | 661.84   | 0.380          | 0.141 | 2.689  | 7.17E-03 | 1    |
| AL356387.1      | 7.13     | -2.153         | 0.801 | -2.688 | 7.19E-03 | 1    |
| HTATSF1         | 457.64   | 0.232          | 0.086 | 2.686  | 7.23E-03 | 1    |
| AC007342.5      | 10.92    | -0.813         | 0.303 | -2.686 | 7.24E-03 | 1    |
| AL355306.2      | 9.19     | -1.625         | 0.605 | -2.684 | 7.28E-03 | 1    |
| AC011753.4      | 1.65     | -1.970         | 0.734 | -2.683 | 7.31E-03 | 1    |
| PLSCR3          | 3.88     | 1.321          | 0.493 | 2.682  | 7.33E-03 | 1    |
| PRPSAP1         | 374.84   | 0.323          | 0.121 | 2.680  | 7.37E-03 | 1    |
| LHFPL6          | 767.99   | 0.449          | 0.168 | 2.679  | 7.38E-03 | 1    |
| PNLIPRP3        | 3.40     | -2.648         | 0.989 | -2.678 | 7.40E-03 | 1    |
| PRR15L          | 306.03   | -0.742         | 0.277 | -2.678 | 7.40E-03 | 1    |
| CEP70           | 389.99   | -0.511         | 0.191 | -2.676 | 7.44E-03 | 1    |
| AP001341.1      | 0.97     | -2.740         | 1.024 | -2.676 | 7.44E-03 | 1    |
| EML1            | 305.28   | 0.453          | 0.169 | 2.676  | 7.45E-03 | 1    |
| AC114812.4      | 3.14     | -2.578         | 0.964 | -2.675 | 7.47E-03 | 1    |
| VWDE            | 31.71    | -0.772         | 0.288 | -2.675 | 7.47E-03 | 1    |
| DUOXA1          | 453.17   | -0.774         | 0.289 | -2.674 | 7.49E-03 | 1    |
| AC027514.1      | 9.95     | -1.514         | 0.567 | -2.671 | 7.55E-03 | 1    |
| AC023449.2      | 17.21    | -0.755         | 0.283 | -2.671 | 7.56E-03 | 1    |
| AC141586.5      | 12.92    | -0.957         | 0.358 | -2.670 | 7.59E-03 | 1    |
| LINC01725       | 26.43    | -0.782         | 0.293 | -2.670 | 7.59E-03 | 1    |
| C1orf198        | 1115.21  | 0.574          | 0.215 | 2.669  | 7.60E-03 | 1    |
| C16orf54        | 117.28   | 0.571          | 0.214 | 2.666  | 7.69E-03 | 1    |
| PLCL2           | 159.26   | 0.391          | 0.147 | 2.663  | 7.75E-03 | 1    |
| POLN            | 26.46    | -0.669         | 0.251 | -2.663 | 7.76E-03 | 1    |
| AC109830.1      | 7.45     | -1.367         | 0.514 | -2.659 | 7.85E-03 | 1    |
| ENSG00000286303 | 4.04     | -2.001         | 0.753 | -2.657 | 7.88E-03 | 1    |
| TAF9B           | 265.85   | 0.294          | 0.111 | 2.657  | 7.89E-03 | 1    |
| SH3PXD2B        | 630.33   | -0.824         | 0.311 | -2.654 | 7.96E-03 | 1    |
| CNNM1           | 11.73    | -0.847         | 0.319 | -2.651 | 8.02E-03 | 1    |
| SCAMP5          | 75.28    | 0.708          | 0.267 | 2.649  | 8.08E-03 | 1    |
| ZNF215          | 64.82    | 0.775          | 0.293 | 2.646  | 8.15E-03 | 1    |
| SLC25A51        | 89.69    | -0.384         | 0.145 | -2.644 | 8.19E-03 | 1    |
| AL592437.2      | 4.69     | -1.469         | 0.556 | -2.644 | 8.19E-03 | 1    |
| RDH5            | 17.46    | 0.504          | 0.191 | 2.643  | 8.22E-03 | 1    |
| TMEM47          | 539.70   | 0.468          | 0.177 | 2.641  | 8.26E-03 | 1    |
| ACSL6           | 21.48    | -0.765         | 0.290 | -2.641 | 8.26E-03 | 1    |
| PKHD1           | 29.69    | -0.967         | 0.366 | -2.641 | 8.27E-03 | 1    |
| AC083899.1      | 11.44    | -0.753         | 0.285 | -2.639 | 8.32E-03 | 1    |
| SEL1L           | 1685.02  | 0.366          | 0.139 | 2.638  | 8.35E-03 | 1    |
| AC011095.1      | 3.06     | -2.168         | 0.822 | -2.638 | 8.35E-03 | 1    |

|                 | baseMean | log2FoldChange | lfcSE | stat   | pvalue   | padj |
|-----------------|----------|----------------|-------|--------|----------|------|
| MALSU1          | 121.48   | 0.311          | 0.118 | 2.638  | 8.35E-03 | 1    |
| ZNF442          | 52.00    | 0.406          | 0.154 | 2.637  | 8.36E-03 | 1    |
| GPR82           | 21.06    | -0.637         | 0.242 | -2.636 | 8.39E-03 | 1    |
| LBP             | 15.26    | -2.333         | 0.885 | -2.636 | 8.40E-03 | 1    |
| GZMM            | 17.13    | 1.044          | 0.396 | 2.634  | 8.44E-03 | 1    |
| KRT8P47         | 7.80     | 0.732          | 0.278 | 2.632  | 8.49E-03 | 1    |
| AC097460.3      | 3.91     | -1.275         | 0.485 | -2.630 | 8.55E-03 | 1    |
| UFSP2           | 333.83   | 0.299          | 0.114 | 2.627  | 8.61E-03 | 1    |
| CCDC62          | 10.23    | -0.782         | 0.298 | -2.626 | 8.63E-03 | 1    |
| FNDC10          | 26.25    | -0.718         | 0.274 | -2.623 | 8.72E-03 | 1    |
| MIR320D1        | 1.74     | -2.185         | 0.833 | -2.622 | 8.73E-03 | 1    |
| AC092652.2      | 8.70     | 0.973          | 0.371 | 2.622  | 8.74E-03 | 1    |
| AF127577.4      | 27.50    | -0.548         | 0.209 | -2.618 | 8.83E-03 | 1    |
| MFAP5           | 97.92    | 1.481          | 0.566 | 2.618  | 8.84E-03 | 1    |
| RASAL1          | 10.36    | -1.105         | 0.422 | -2.617 | 8.87E-03 | 1    |
| DUSP26          | 10.97    | 0.891          | 0.341 | 2.616  | 8.89E-03 | 1    |
| AC015917.2      | 4.97     | 0.899          | 0.344 | 2.616  | 8.90E-03 | 1    |
| NBEAP1          | 8.66     | -1.357         | 0.519 | -2.614 | 8.96E-03 | 1    |
| ZPLD1           | 8.00     | -1.639         | 0.627 | -2.612 | 9.00E-03 | 1    |
| AL121832.2      | 8.33     | 0.736          | 0.282 | 2.611  | 9.02E-03 | 1    |
| AC241377.3      | 5.53     | 0.734          | 0.281 | 2.610  | 9.06E-03 | 1    |
| AL136366.1      | 10.80    | 0.755          | 0.289 | 2.608  | 9.11E-03 | 1    |
| FMO5            | 495.66   | -0.759         | 0.292 | -2.602 | 9.26E-03 | 1    |
| AC022540.1      | 17.23    | -0.571         | 0.220 | -2.602 | 9.26E-03 | 1    |
| SERPINF2        | 114.69   | -0.951         | 0.366 | -2.600 | 9.31E-03 | 1    |
| RAC3            | 12.66    | -1.048         | 0.403 | -2.600 | 9.32E-03 | 1    |
| ENSG00000288013 | 3.13     | 1.543          | 0.593 | 2.599  | 9.34E-03 | 1    |
| ENSG00000287695 | 15.22    | -0.688         | 0.265 | -2.599 | 9.34E-03 | 1    |
| AL023583.1      | 2.86     | -2.084         | 0.802 | -2.598 | 9.37E-03 | 1    |
| AC008802.1      | 1.86     | -1.987         | 0.765 | -2.598 | 9.39E-03 | 1    |
| DOCK3           | 42.49    | -0.643         | 0.248 | -2.595 | 9.46E-03 | 1    |
| C18orf32        | 82.56    | 0.316          | 0.122 | 2.593  | 9.53E-03 | 1    |
| COL19A1         | 21.73    | -1.017         | 0.392 | -2.592 | 9.54E-03 | 1    |
| AP005482.3      | 9.33     | -0.817         | 0.315 | -2.592 | 9.54E-03 | 1    |
| AL772337.1      | 3.42     | -2.807         | 1.084 | -2.590 | 9.59E-03 | 1    |
| AC021086.1      | 6.87     | -0.927         | 0.358 | -2.589 | 9.63E-03 | 1    |
| TXNDC15         | 587.13   | 0.227          | 0.088 | 2.585  | 9.73E-03 | 1    |
| AC068633.1      | 2.09     | 2.028          | 0.785 | 2.584  | 9.78E-03 | 1    |
| SLC2A12         | 81.32    | 0.570          | 0.221 | 2.583  | 9.78E-03 | 1    |
| C2-AS1          | 17.04    | -0.683         | 0.265 | -2.582 | 9.81E-03 | 1    |
| GIMAP2          | 187.57   | 0.472          | 0.183 | 2.581  | 9.86E-03 | 1    |
| AAMDC           | 175.54   | 0.313          | 0.121 | 2.581  | 9.86E-03 | 1    |
| RPL31P61        | 1.87     | -1.721         | 0.667 | -2.581 | 9.86E-03 | 1    |
| AC009271.1      | 8.35     | -1.333         | 0.517 | -2.580 | 9.87E-03 | 1    |
| NPM1P27         | 27.04    | -0.453         | 0.176 | -2.580 | 9.88E-03 | 1    |
| PTGDR           | 30.48    | 0.871          | 0.338 | 2.579  | 9.91E-03 | 1    |

Supplementary file3.

The table includes top DE genes in the comparison of IPF samples with and without IL7 gene fusion.

baseMean: mean of all samples;

log2 fold change (MLE): IPF with gene fusion vs without gene fusion;

lfcSE: standard error of log2 fold change;

stat: Wald statistic;

pvalue: p-value of two-tailed test based on normal distribution;

padj: adjusted p-value
