# Supplementary material for: Gene fusion of IL7 involved in the regulation of idiopathic pulmonary fibrosis
Source: PubMed Central journal article supplement — Ther Adv Respir Dis. 2021 Apr 20;15:1753466621995045. doi: 10.1177/1753466621995045 (PMC8064517; doi:10.1177/1753466621995045), 2021-04-20
Supplement: sj-pdf-7-tar-10.1177_1753466621995045.pdf [file sj-pdf-7-tar-10.1177_1753466621995045.pdf]

Pearson correlation between IL7 and IPF feature genes

| Gene     | Result from this study |         | r from      |
|----------|------------------------|---------|-------------|
|          | r (95%CI)              | p_value | GeneFriends |
| CRHR1    | N/A                    | N/A     | N/A         |
| CAV1     | -0.11(-0.31, 0.09)     | 0.281   | 0.05        |
| MUC5AC   | 0.27(0.07, 0.45)       | 9.1E-03 | 0.19        |
| ELMOD2   | 0.4(0.21, 0.56)        | 9.3E-05 | N/A         |
| SFTPA2   | -0.32(-0.49, -0.12)    | 2.3E-03 | 0.03        |
| MUC5B    | 0.24(0.03, 0.42)       | 0.024   | 0.03        |
| STAT3    | -0.1(-0.3, 0.11)       | 0.338   | 0.34        |
| ESR1     | 0.28(0.08, 0.46)       | 6.6E-03 | 0.28        |
| TERT     | 0.12(-0.09, 0.32)      | 0.251   | 0.13        |
| WNT5A    | 0.08(-0.13, 0.28)      | 0.474   | 0.02        |
| ATP11A   | -0.36(-0.52, -0.16)    | 5.5E-04 | 0.28        |
| DPP9     | -0.38(-0.54, -0.19)    | 2.3E-04 | 0.33        |
| DSP      | 0.26(0.05, 0.44)       | 0.014   | 0.03        |
| FAM13A   | 0.22(0.02, 0.41)       | 0.033   | 0.35        |
| GPER1    | -0.11(-0.31, 0.1)      | 0.293   | 0.11        |
| PARN     | N/A                    | N/A     | N/A         |
| RTEL1    | -0.12(-0.32, 0.09)     | 0.262   | 0.36        |
| SFTPC    | -0.34(-0.51, -0.15)    | 0.001   | 0.13        |
| STN1     | -0.27(-0.45, -0.06)    | 0.011   | 0.27        |
| TERC     | -0.05(-0.25, 0.16)     | 0.659   | 0           |
| MMP3     | -0.09(-0.29, 0.12)     | 0.405   | 0.01        |
| PLAU     | -0.09(-0.29, 0.12)     | 0.384   | 0.15        |
| HIF1A    | 0.02(-0.19, 0.23)      | 0.850   | 0.24        |
| AGT      | 0.06(-0.15, 0.26)      | 0.579   | 0.05        |
| CR1      | 0.14(-0.07, 0.33)      | 0.194   | 0.04        |
| CXCL10   | 0.08(-0.13, 0.28)      | 0.467   | 0.06        |
| CXCL5    | -0.09(-0.29, 0.11)     | 0.379   | 0.06        |
| FCGR2A   | -0.04(-0.24, 0.17)     | 0.739   | 0.18        |
| FCGR3B   | 0.21(0, 0.39)          | 0.051   | 0.13        |
| IL6      | 0.16(-0.05, 0.36)      | 0.126   | 0.1         |
| LTA      | N/A                    | N/A     | N/A         |
| MICA     | -0.27(-0.45, -0.07)    | 9.8E-03 | 0.09        |
| MMP1     | -0.05(-0.26, 0.15)     | 0.606   | 0           |
| PTGS2    | 0.19(-0.02, 0.38)      | 0.075   | 0.27        |
| TGFB1    | -0.38(-0.54, -0.19)    | 2.2E-04 | 0.31        |
| TNF      | N/A                    | N/A     | N/A         |
| TNFRSF1B | -0.16(-0.36, 0.04)     | 0.120   | 0.19        |
| VEGFA    | -0.06(-0.27, 0.14)     | 0.545   | 0.24        |
| ACE      | -0.18(-0.37, 0.03)     | 0.085   | 0.2         |
| CDKN1A   | 0.03(-0.18, 0.24)      | 0.763   | 0.19        |
| EGFR     | -0.09(-0.29, 0.12)     | 0.388   | 0.01        |
| ERBB2    | -0.05(-0.25, 0.16)     | 0.663   | 0.11        |
| ERBB3    | 0(-0.21, 0.21)         | 0.996   | 0.08        |
| HLA-DRB1 | N/A                    | N/A     | N/A         |
| IFNG     | 0.16(-0.05, 0.35)      | 0.131   | 0.18        |
| IL10     | 0.16(-0.05, 0.35)      | 0.136   | 0.14        |
| IL12A    | 0.27(0.07, 0.45)       | 0.010   | 0.17        |
| IL13     | 0.14(-0.07, 0.34)      | 0.183   | 0.02        |
| IL1A     | 0.08(-0.13, 0.28)      | 0.473   | 0.04        |
| SFTPA1   | -0.32(-0.5, -0.13)     | 1.8E-03 | 0.09        |
| TOLLIP   | -0.27(-0.45, -0.07)    | 0.008   | 0.32        |
| MAPT-AS1 | -0.02(-0.23, 0.18)     | 0.837   | 0.15        |
| MDGA2    | 0.12(-0.08, 0.32)      | 0.245   | 0.12        |
| STN1     | -0.27(-0.45, -0.06)    | 0.011   | 0.27        |

Supplementary table 4. part1

Above lists the Pearson correlation coefficients between the expression of IL7 and those of known IPF feature genes. The IPF associated feature genes are collected from CTDBase, the Harmonizome, and NCBI. The type 1 error of the null hypothesis test is set as 0.05.

The last column list the correlation coefficients calculated from 46475 human transcripts from the GeneFriends.org database.

Pearson correlation between AC083837.1 and IPF feature genes

| Result from this study |                     |         |
|------------------------|---------------------|---------|
| Gene                   | r (95%CI)           | p_value |
| CRHR1                  | N/A                 | N/A     |
| CAV1                   | -0.41(-0.57, -0.23) | 4.8E-05 |
| MUC5AC                 | 0.34(0.15, 0.51)    | 8.7E-04 |
| ELMOD2                 | 0.1(-0.11, 0.3)     | 0.357   |
| SFTPA2                 | -0.33(-0.5, -0.14)  | 1.3E-03 |
| MUC5B                  | 0.39(0.2, 0.55)     | 1.4E-04 |
| STAT3                  | 0.23(0.03, 0.42)    | 0.027   |
| ESR1                   | 0.21(0, 0.4)        | 0.047   |
| TERT                   | 0.35(0.15, 0.52)    | 7.4E-04 |
| WNT5A                  | 0.05(-0.16, 0.25)   | 0.651   |
| ATP11A                 | -0.22(-0.41, -0.02) | 0.034   |
| DPP9                   | -0.04(-0.25, 0.16)  | 0.678   |
| DSP                    | 0.17(-0.04, 0.36)   | 0.108   |
| FAM13A                 | -0.05(-0.25, 0.16)  | 0.634   |
| GPER1                  | -0.26(-0.45, -0.06) | 0.011   |
| PARN                   | N/A                 | N/A     |
| RTEL1                  | 0.09(-0.12, 0.29)   | 0.392   |
| SFTPC                  | -0.43(-0.58, -0.24) | 2.4E-05 |
| STN1                   | -0.35(-0.52, -0.15) | 6.9E-04 |
| TERC                   | -0.04(-0.25, 0.16)  | 0.677   |
| MMP3                   | 0.1(-0.1, 0.3)      | 0.322   |
| PLAU                   | 0.3(0.1, 0.48)      | 3.7E-03 |
| HIF1A                  | 0.39(0.2, 0.55)     | 1.3E-04 |
| AGT                    | 0.32(0.13, 0.5)     | 1.7E-03 |
| CR1                    | 0.33(0.14, 0.5)     | 1.3E-03 |
| CXCL10                 | 0.33(0.13, 0.5)     | 1.7E-03 |
| CXCL5                  | 0.25(0.05, 0.43)    | 0.017   |
| FCGR2A                 | 0.1(-0.11, 0.3)     | 0.347   |
| FCGR3B                 | 0.26(0.06, 0.44)    | 0.012   |
| IL6                    | 0.43(0.24, 0.58)    | 2.3E-05 |
| LTA                    | N/A                 | N/A     |
| MICA                   | -0.28(-0.46, -0.07) | 8.0E-03 |
| MMP1                   | 0.26(0.06, 0.44)    | 0.012   |
| PTGS2                  | 0.27(0.07, 0.45)    | 0.009   |
| TGFB1                  | 0(-0.21, 0.21)      | 0.996   |
| TNF                    | N/A                 | N/A     |
| TNFRSF1B               | 0.24(0.04, 0.43)    | 0.019   |
| VEGFA                  | -0.02(-0.23, 0.18)  | 0.820   |
| ACE                    | -0.09(-0.29, 0.12)  | 0.410   |
| CDKN1A                 | 0.41(0.22, 0.57)    | 5.6E-05 |
| EGFR                   | -0.34(-0.51, -0.15) | 8.6E-04 |
| ERBB2                  | -0.03(-0.24, 0.18)  | 0.768   |
| ERBB3                  | -0.29(-0.47, -0.09) | 4.8E-03 |
| HLA-DRB1               | N/A                 | N/A     |
| IFNG                   | 0.07(-0.14, 0.27)   | 0.501   |
| IL10                   | 0.26(0.06, 0.45)    | 0.011   |
| IL12A                  | 0.23(0.03, 0.42)    | 0.027   |
| IL13                   | 0.25(0.04, 0.43)    | 0.018   |
| IL1A                   | 0.08(-0.13, 0.28)   | 0.446   |
| SFTPA1                 | -0.32(-0.5, -0.12)  | 1.8E-03 |
| TOLLIP                 | -0.07(-0.27, 0.14)  | 0.510   |
| MAPT-AS1               | 0.13(-0.08, 0.33)   | 0.213   |
| MDGA2                  | 0.08(-0.13, 0.28)   | 0.478   |
| STN1                   | -0.35(-0.52, -0.15) | 6.9E-04 |

Supplementary table 4. part2

This table lists the Pearson correlation coefficients between the expression of IL7 and those of known IPF feature genes. The IPF associated feature genes are collected from CTDbase, the Harmonizome, and NCBI. The type 1 error of the null hypothesis test is set as 0.05.
