# Supplementary material for: Gene fusion of IL7 involved in the regulation of idiopathic pulmonary fibrosis
Source: PubMed Central journal article supplement — Ther Adv Respir Dis. 2021 Apr 20;15:1753466621995045. doi: 10.1177/1753466621995045 (PMC8064517; doi:10.1177/1753466621995045), 2021-04-20
Supplement: sj-pdf-8-tar-10.1177_1753466621995045.pdf [file sj-pdf-8-tar-10.1177_1753466621995045.pdf]

| Gene Set                                                                | SIZE | ES    | NES   | NOM p-val | FDR q-val | FWER p-val | RANK AT MAX | LEADING EDGE                   |
|-------------------------------------------------------------------------|------|-------|-------|-----------|-----------|------------|-------------|--------------------------------|
| KEGG_NATURAL_KILLER_CELL_MEDIATED_CYTOTOXICITY                          | 35   | 0.725 | 2.434 | 0         | 0         | 0          | 1026        | tags=43%, list=14%, signal=50% |
| HALLMARK_INTERFERON_ALPHA_RESPONSE                                      | 29   | 0.626 | 2.026 | 0         | 0.026     | 0.293      | 1342        | tags=55%, list=18%, signal=67% |
| RADAEVA_RESPONSE_TO_IFNA1_UP                                            | 18   | 0.695 | 2.016 | 0.003     | 0.027     | 0.323      | 1342        | tags=61%, list=18%, signal=75% |
| GO_ANTIGEN_BINDING                                                      | 147  | 0.451 | 2.001 | 0         | 0.031     | 0.379      | 1053        | tags=34%, list=14%, signal=39% |
| GO_CELL_MIGRATION_INVOLVED_IN_SPROUTING_ANGIOGENESIS                    | 31   | 0.595 | 1.979 | 0         | 0.040     | 0.493      | 836         | tags=42%, list=11%, signal=47% |
| REACTOME_INTERFERON_ALPHA_BETA_SIGNALING                                | 18   | 0.668 | 1.967 | 0         | 0.044     | 0.547      | 1261        | tags=61%, list=17%, signal=74% |
| GO_REGULATION_OF_EPITHELIAL_CELL_APOPTOTIC_PROCESS                      | 34   | 0.575 | 1.954 | 0         | 0.049     | 0.61       | 859         | tags=41%, list=12%, signal=46% |
| HALLMARK_INTERFERON_GAMMA_RESPONSE                                      | 60   | 0.511 | 1.940 | 0         | 0.055     | 0.669      | 1691        | tags=45%, list=23%, signal=58% |
| GO_CELLULAR_RESPONSE_TO_VASCULAR_ENDOTHELIAL_GROWTH_FACTOR_S<br>TIMULUS | 28   | 0.598 | 1.904 | 0         | 0.076     | 0.808      | 1290        | tags=64%, list=18%, signal=78% |
| GSE10325_CD4_TCELL_VS_BCELL_UP                                          | 79   | 0.480 | 1.897 | 0         | 0.078     | 0.832      | 1494        | tags=35%, list=20%, signal=44% |
| GO_REGULATION_OF_CELL_MIGRATION_INVOLVED_IN_SPROUTING_ANGIOE<br>NESIS   | 22   | 0.633 | 1.890 | 0.003     | 0.079     | 0.86       | 836         | tags=41%, list=11%, signal=46% |
| GO_ENDOTHELIAL_CELL_APOPTOTIC_PROCESS                                   | 28   | 0.594 | 1.879 | 0         | 0.083     | 0.895      | 859         | tags=43%, list=12%, signal=48% |
| HALLMARK_TGF_BETA_SIGNALING                                             | 26   | 0.597 | 1.867 | 0.003     | 0.088     | 0.92       | 1616        | tags=58%, list=22%, signal=74% |
| PHONG_TNF_TARGETS_UP                                                    | 32   | 0.568 | 1.862 | 0         | 0.088     | 0.929      | 1086        | tags=44%, list=15%, signal=51% |
| GO_ADAPTIVE_IMMUNE_RESPONSE                                             | 289  | 0.387 | 1.828 | 0         | 0.113     | 0.978      | 1261        | tags=31%, list=17%, signal=37% |
| GO_POSITIVE_REGULATION_OF_ENDOTHELIAL_CELL_MIGRATION                    | 45   | 0.519 | 1.817 | 0         | 0.113     | 0.987      | 1693        | tags=47%, list=23%, signal=60% |
| GO_POSITIVE_REGULATION_OF_ENDOTHELIAL_CELL_PROLIFERATION                | 49   | 0.488 | 1.802 | 0         | 0.125     | 0.994      | 797         | tags=37%, list=11%, signal=41% |
| GO_REGULATION_OF_ENDOTHELIAL_CELL_MIGRATION                             | 78   | 0.456 | 1.791 | 0         | 0.131     | 0.994      | 836         | tags=29%, list=11%, signal=33% |
| GO_REGULATION_OF_CD4_POSITIVE_ALPHA_BETA_T_CELL_ACTIVATION              | 25   | 0.571 | 1.788 | 0         | 0.132     | 0.995      | 701         | tags=32%, list=10%, signal=35% |
| GO_EPITHELIAL_CELL_APOPTOTIC_PROCESS                                    | 42   | 0.515 | 1.784 | 0.004     | 0.137     | 0.995      | 859         | tags=36%, list=12%, signal=40% |
| HALLMARK_TNFA_SIGNALING_VIA_NFKB                                        | 80   | 0.443 | 1.778 | 0         | 0.142     | 0.996      | 1089        | tags=31%, list=15%, signal=36% |
| GO_SPROUTING_ANGIOGENESIS                                               | 65   | 0.450 | 1.756 | 0         | 0.160     | 1          | 1348        | tags=46%, list=18%, signal=56% |
| GO_REGULATION_OF_EPITHELIAL_CELL_MIGRATION                              | 109  | 0.419 | 1.756 | 0         | 0.159     | 1          | 1693        | tags=41%, list=23%, signal=53% |
| GO_ENDOTHELIAL_CELL_MIGRATION                                           | 99   | 0.430 | 1.747 | 0         | 0.164     | 1          | 836         | tags=29%, list=11%, signal=33% |
| GO_POSITIVE_REGULATION_OF_EPITHELIAL_CELL_MIGRATION                     | 66   | 0.442 | 1.739 | 0         | 0.164     | 1          | 1693        | tags=44%, list=23%, signal=57% |
| GSE34006_A2AR_KO_VS_A2AR_AGONIST_TREATED_TREG_UP                        | 64   | 0.448 | 1.738 | 0         | 0.162     | 1          | 1453        | tags=34%, list=20%, signal=43% |
| BROWNE_INTERFERON_RESPONSIVE_GENES                                      | 31   | 0.520 | 1.738 | 0         | 0.161     | 1          | 1342        | tags=52%, list=18%, signal=63% |
| PID_VEGFR1_2_PATHWAY                                                    | 18   | 0.608 | 1.736 | 0.015     | 0.162     | 1          | 1641        | tags=50%, list=22%, signal=64% |
| AMIT_EGF_RESPONSE_40_HELA                                               | 21   | 0.580 | 1.736 | 0.003     | 0.162     | 1          | 1091        | tags=38%, list=15%, signal=45% |
| GSE22886_DAY0_VS_DAY7_MONOCYTE_IN_CULTURE_UP                            | 83   | 0.422 | 1.734 | 0         | 0.162     | 1          | 2508        | tags=59%, list=34%, signal=89% |
| CHR17Q23                                                                | 15   | 0.634 | 1.731 | 0.011     | 0.165     | 1          | 1180        | tags=47%, list=16%, signal=56% |
| GSE41867_NAIVE_VS_DAY8_LCMV_EFFECTOR_CD8_TCELL_DN                       | 75   | 0.433 | 1.729 | 0         | 0.167     | 1          | 2553        | tags=55%, list=35%, signal=83% |
| GO_CAVEOLA                                                              | 35   | 0.508 | 1.727 | 0         | 0.168     | 1          | 986         | tags=37%, list=13%, signal=43% |

| Gene Set                                                                          | SIZE | ES    | NES   | NOM p-val | FDR q-val | FWER p-val | RANK AT MAX | LEADING EDGE                   |
|-----------------------------------------------------------------------------------|------|-------|-------|-----------|-----------|------------|-------------|--------------------------------|
| GSE17974_OH_VS_1H_IN_VITRO_ACT_CD4_TCELL_DN                                       | 58   | 0.457 | 1.727 | 0         | 0.167     | 1          | 1532        | tags=33%, list=21%, signal=41% |
| GSE22886_TCELL_VS_BCELL_NAIVE_UP                                                  | 69   | 0.440 | 1.726 | 0         | 0.168     | 1          | 2526        | tags=54%, list=34%, signal=81% |
| GO_NEGATIVE_REGULATION_OF_EPITHELIAL_CELL_APOPTOTIC_PROCESS                       | 18   | 0.597 | 1.722 | 0.009     | 0.172     | 1          | 633         | tags=44%, list=9%, signal=49%  |
| REACTOME_INTERFERON_SIGNALING                                                     | 54   | 0.458 | 1.705 | 0.004     | 0.188     | 1          | 1691        | tags=43%, list=23%, signal=55% |
| SANA_RESPONSE_TO_IFNG_UP                                                          | 19   | 0.578 | 1.704 | 0.013     | 0.188     | 1          | 1026        | tags=47%, list=14%, signal=55% |
| GO_BLOOD_VESSEL_ENDOTHELIAL_CELL_PROLIFERATION_INVOLVED_IN_SPROUTING_ANGIOGENESIS | 15   | 0.627 | 1.703 | 0.013     | 0.187     | 1          | 797         | tags=60%, list=11%, signal=67% |
| PID_TGFBR_PATHWAY                                                                 | 22   | 0.572 | 1.700 | 0.003     | 0.188     | 1          | 2253        | tags=68%, list=31%, signal=98% |
| HECKER_IFNB1_TARGETS                                                              | 32   | 0.515 | 1.697 | 0.003     | 0.187     | 1          | 1342        | tags=50%, list=18%, signal=61% |
| GO_NEGATIVE_REGULATION_OF_SPROUTING_ANGIOGENESIS                                  | 17   | 0.588 | 1.685 | 0.020     | 0.196     | 1          | 1841        | tags=65%, list=25%, signal=86% |
| REACTOME_SIGNALING_BY_FGFR                                                        | 21   | 0.559 | 1.685 | 0.006     | 0.196     | 1          | 599         | tags=19%, list=8%, signal=21%  |
| GO_ENDOTHELIAL_CELL_PROLIFERATION                                                 | 74   | 0.428 | 1.673 | 0.009     | 0.202     | 1          | 797         | tags=30%, list=11%, signal=33% |
| REACTOME_FCERI_MEDIATED_MAPK_ACTIVATION                                           | 64   | 0.441 | 1.672 | 0         | 0.203     | 1          | 1931        | tags=44%, list=26%, signal=59% |
| GO_RESPONSE_TO_INTERFERON_GAMMA                                                   | 61   | 0.423 | 1.657 | 0.008     | 0.218     | 1          | 1680        | tags=39%, list=23%, signal=51% |
| GO_REGULATION_OF_NIK_NF_KAPPAB_SIGNALING                                          | 34   | 0.496 | 1.650 | 0.007     | 0.215     | 1          | 1693        | tags=38%, list=23%, signal=49% |
| GO_NIK_NF_KAPPAB_SIGNALING                                                        | 38   | 0.478 | 1.648 | 0         | 0.217     | 1          | 1693        | tags=34%, list=23%, signal=44% |
| GSE3920_IFNA_VS_IFNB_TREATED_ENDOTHELIAL_CELL_DN                                  | 73   | 0.424 | 1.646 | 0         | 0.217     | 1          | 1116        | tags=27%, list=15%, signal=32% |
| GO_FRIZZLED_BINDING                                                               | 17   | 0.567 | 1.645 | 0.014     | 0.218     | 1          | 1088        | tags=47%, list=15%, signal=55% |
| LI_INDUCED_T_TO_NATURAL_KILLER_UP                                                 | 138  | 0.370 | 1.642 | 0         | 0.217     | 1          | 1252        | tags=25%, list=17%, signal=30% |
| GSE13229_IMM_VS_MATURE_NKCELL_DN                                                  | 71   | 0.412 | 1.633 | 0         | 0.224     | 1          | 2160        | tags=52%, list=29%, signal=73% |
| GO_LEUKOCYTE_MEDIATED_CYTOTOXICITY                                                | 41   | 0.460 | 1.624 | 0.007     | 0.233     | 1          | 1269        | tags=39%, list=17%, signal=47% |
| BROCKE_APOPTOSIS_REVERSED_BY_IL6                                                  | 59   | 0.436 | 1.622 | 0         | 0.234     | 1          | 1023        | tags=29%, list=14%, signal=33% |
| GO_INTERFERON_GAMMA_MEDIATED_SIGNALING_PATHWAY                                    | 21   | 0.532 | 1.611 | 0.021     | 0.237     | 1          | 1502        | tags=43%, list=20%, signal=54% |
| GO_NATURAL_KILLER_CELL_MEDIATED_IMMUNITY                                          | 22   | 0.535 | 1.610 | 0.02      | 0.237     | 1          | 1269        | tags=45%, list=17%, signal=55% |
| GO_BLOOD_VESSEL_ENDOTHELIAL_CELL_MIGRATION                                        | 52   | 0.449 | 1.606 | 0.008     | 0.237     | 1          | 1693        | tags=48%, list=23%, signal=62% |
| GO_RESPONSE_TO_TYPE_I_INTERFERON                                                  | 27   | 0.507 | 1.606 | 0.020     | 0.237     | 1          | 1261        | tags=44%, list=17%, signal=53% |
| GO_VASCULAR_ENDOTHELIAL_GROWTH_FACTOR_SIGNALING_PATHWAY                           | 21   | 0.534 | 1.599 | 0.026     | 0.239     | 1          | 1290        | tags=62%, list=18%, signal=75% |

Supplementary file 5: Significantly enriched gene sets in IPF tissues with IL7=AC083837.1 gene fusion.

Columns: Size: Number of genes in the gene set that included in the expression matrix; ES: enrichment score; NES: Normalized enrichment score; NOM p-value: Nominal p-value; FDR q-value: False discovery rate; FWER p-value: Familywise-error rate; RANK AT MAX: The position in the ranked list at which the maximum enrichment score occurred; LEADING EDGE: three statistics used to define the leading-edge subsets (<https://www.gsea-msigdb.org/gsea/doc/GSEAUserGuideFrame.html>).
