# Supplementary material for: Gene fusion of IL7 involved in the regulation of idiopathic pulmonary fibrosis
Source: PubMed Central journal article supplement — Ther Adv Respir Dis. 2021 Apr 20;15:1753466621995045. doi: 10.1177/1753466621995045 (PMC8064517; doi:10.1177/1753466621995045), 2021-04-20
Supplement: sj-pdf-9-tar-10.1177_1753466621995045.pdf [file sj-pdf-9-tar-10.1177_1753466621995045.pdf]

| Gene Set                                               | SIZE | ES    | NES   | NOM   |           | FWER p- |        | RANK                            | LEADING EDGE |
|--------------------------------------------------------|------|-------|-------|-------|-----------|---------|--------|---------------------------------|--------------|
|                                                        |      |       |       | p-val | FDR q-val | val     | AT MAX |                                 |              |
| GO_AXONEME_PART                                        | 31   | 0.869 | 2.806 | 0     | 0         | 0       | 630    | tags=90%, list=9%, signal=98%   |              |
| GO_CELL_PROJECTION_ASSEMBLY                            | 236  | 0.639 | 2.793 | 0     | 0         | 0       | 960    | tags=50%, list=13%, signal=56%  |              |
| GO_AXONEMAL_DYNEIN_COMPLEX_ASSEMBLY                    | 22   | 0.917 | 2.735 | 0     | 0         | 0       | 630    | tags=100%, list=9%, signal=109% |              |
| GO_CILIUM_OR_FLAGELLUM_DEPENDENT_CELL_MOTILITY         | 24   | 0.885 | 2.703 | 0     | 0         | 0       | 544    | tags=92%, list=7%, signal=99%   |              |
| GO_MICROTUBULE_BASED_PROCESS                           | 295  | 0.595 | 2.664 | 0     | 0         | 0       | 765    | tags=41%, list=10%, signal=44%  |              |
| GO_DYNEIN_COMPLEX                                      | 30   | 0.828 | 2.663 | 0     | 0         | 0       | 630    | tags=73%, list=9%, signal=80%   |              |
| GO_ORGANELLE_ASSEMBLY                                  | 291  | 0.567 | 2.555 | 0     | 0         | 0       | 1027   | tags=43%, list=14%, signal=48%  |              |
| GO_INTRACILIARY_TRANSPORT_INVOLVED_IN_CILIUM_ASSEMBLY  | 22   | 0.837 | 2.535 | 0     | 0         | 0       | 765    | tags=82%, list=10%, signal=91%  |              |
| GO_CILIARY_TRANSITION_ZONE                             | 20   | 0.850 | 2.495 | 0     | 0         | 0       | 765    | tags=85%, list=10%, signal=95%  |              |
| GO_SPERM_PART                                          | 75   | 0.654 | 2.493 | 0     | 0         | 0       | 1357   | tags=64%, list=19%, signal=78%  |              |
| GO_MICROTUBULE_CYTOSKELETON_ORGANIZATION               | 206  | 0.554 | 2.418 | 0     | 0         | 0       | 1027   | tags=41%, list=14%, signal=47%  |              |
| GO_SPERM_MOTILITY                                      | 35   | 0.722 | 2.385 | 0     | 0         | 0       | 630    | tags=57%, list=9%, signal=62%   |              |
| GO_MICROTUBULE_ASSOCIATED_COMPLEX                      | 71   | 0.625 | 2.360 | 0     | 0         | 0       | 630    | tags=41%, list=9%, signal=44%   |              |
| GO_DYNEIN_LIGHT_CHAIN_BINDING                          | 16   | 0.854 | 2.320 | 0     | 0         | 0       | 630    | tags=81%, list=9%, signal=89%   |              |
| GO_MICROTUBULE_CYTOSKELETON                            | 398  | 0.498 | 2.290 | 0     | 0         | 0       | 1027   | tags=37%, list=14%, signal=41%  |              |
| GO_MICROTUBULE_ORGANIZING_CENTER                       | 238  | 0.511 | 2.255 | 0     | 1.06E-05  | 0.001   | 1047   | tags=40%, list=14%, signal=46%  |              |
| GO_NON_MOTILE_CILIUM                                   | 43   | 0.631 | 2.178 | 0     | 1.15E-04  | 0.012   | 1134   | tags=47%, list=15%, signal=55%  |              |
| GO_SPERMATID_DIFFERENTIATION                           | 40   | 0.624 | 2.133 | 0     | 3.51E-04  | 0.039   | 763    | tags=48%, list=10%, signal=53%  |              |
| GO_MALE_GAMETE_GENERATION                              | 161  | 0.494 | 2.103 | 0     | 5.29E-04  | 0.059   | 1256   | tags=39%, list=17%, signal=45%  |              |
| GO_9PLUS0_NON_MOTILE_CILIUM                            | 32   | 0.638 | 2.070 | 0     | 8.99E-04  | 0.102   | 1134   | tags=44%, list=15%, signal=52%  |              |
| GO_CYTOSKELETON_DEPENDENT_INTRACELLULAR_TRANSPORT      | 72   | 0.536 | 2.039 | 0     | 1.69E-03  | 0.19    | 805    | tags=36%, list=11%, signal=40%  |              |
| GO_GAMETE_GENERATION                                   | 197  | 0.449 | 1.947 | 0     | 0.008     | 0.638   | 1399   | tags=37%, list=19%, signal=44%  |              |
| SPIRA_SMOKERS_LUNG_CANCER_UP                           | 22   | 0.646 | 1.935 | 0     | 0.009     | 0.708   | 1085   | tags=50%, list=15%, signal=59%  |              |
| GO_MICROTUBULE_ORGANIZING_CENTER_ORGANIZATION          | 42   | 0.554 | 1.920 | 0     | 0.011     | 0.793   | 1080   | tags=43%, list=15%, signal=50%  |              |
| GO_PROTEIN_CONTAINING_COMPLEX_LOCALIZATION             | 94   | 0.485 | 1.916 | 0     | 0.012     | 0.816   | 765    | tags=29%, list=10%, signal=32%  |              |
| DOANE_BREAST_CANCER_ESR1_UP                            | 63   | 0.516 | 1.890 | 0     | 0.016     | 0.907   | 1346   | tags=43%, list=18%, signal=52%  |              |
| GO_SEXUAL_REPRODUCTION                                 | 237  | 0.428 | 1.886 | 0     | 0.017     | 0.91    | 1399   | tags=34%, list=19%, signal=41%  |              |
| GO_SMOOTHENED_SIGNALING_PATHWAY                        | 66   | 0.508 | 1.872 | 0     | 0.019     | 0.94    | 740    | tags=35%, list=10%, signal=38%  |              |
| REACTOME_CARGO_TRAFFICKING_TO_THE_PERICILIARY_MEMBRANE | 18   | 0.656 | 1.870 | 0.002 | 0.020     | 0.947   | 1176   | tags=44%, list=16%, signal=53%  |              |
| GO_TUBULIN_BINDING                                     | 128  | 0.446 | 1.849 | 0     | 0.026     | 0.983   | 924    | tags=32%, list=13%, signal=36%  |              |
| SMID_BREAST_CANCER_RELAPSE_IN_BONE_UP                  | 54   | 0.518 | 1.847 | 0     | 0.026     | 0.984   | 1265   | tags=44%, list=17%, signal=53%  |              |

| Gene Set                                                                     | SIZE | ES    | NES   | NOM p-val | FDR q-val | FWER p-val | RANK AT MAX | LEADING EDGE                   |
|------------------------------------------------------------------------------|------|-------|-------|-----------|-----------|------------|-------------|--------------------------------|
| GO_NUCLEOSIDE_DIPHOSPHATE_METABOLIC_PROCESS                                  | 16   | 0.672 | 1.846 | 0.002     | 0.026     | 0.985      | 633         | tags=44%, list=9%, signal=48%  |
| GO_ATPASE_ACTIVITY                                                           | 124  | 0.447 | 1.839 | 0         | 0.029     | 0.989      | 1389        | tags=37%, list=19%, signal=45% |
| GO_GERM_CELL_DEVELOPMENT                                                     | 65   | 0.494 | 1.839 | 0         | 0.028     | 0.989      | 1350        | tags=42%, list=18%, signal=50% |
| GSE5542_IFNG_VS_IFNA_TREATED_EPITHELIAL_CELLS_24H_UP                         | 60   | 0.480 | 1.773 | 0         | 0.055     | 1          | 1097        | tags=28%, list=15%, signal=33% |
| RICKMAN_TUMOR_DIFFERENTIATED_WELL_VS_MODERATELY_UP                           | 47   | 0.505 | 1.771 | 0         | 0.055     | 1          | 1572        | tags=43%, list=21%, signal=54% |
| GO_CELLULAR_PROCESS_INVOLVED_IN_REPRODUCTION_IN_MULTICELLULAR_ORGANISM       | 95   | 0.439 | 1.752 | 0.001     | 0.066     | 1          | 1350        | tags=35%, list=18%, signal=42% |
| KIM_MYC_AMPLIFICATION_TARGETS_DN                                             | 39   | 0.513 | 1.742 | 0.003     | 0.072     | 1          | 1840        | tags=51%, list=25%, signal=68% |
| GO_MULTICELLULAR_ORGANISM_REPRODUCTION                                       | 262  | 0.382 | 1.710 | 0         | 0.092     | 1          | 1399        | tags=31%, list=19%, signal=36% |
| HALLMARK_SPERMATOGENESIS                                                     | 34   | 0.515 | 1.701 | 0.006     | 0.100     | 1          | 1438        | tags=41%, list=20%, signal=51% |
| GSE21670_UNTREATED_VS_TGFB_TREATED_CD4_TCELL_UP                              | 86   | 0.428 | 1.683 | 0.004     | 0.117     | 1          | 1016        | tags=26%, list=14%, signal=29% |
| GSE5542_IFNG_VS_IFNA_TREATED_EPITHELIAL_CELLS_6H_UP                          | 60   | 0.453 | 1.674 | 0.01      | 0.125     | 1          | 985         | tags=32%, list=13%, signal=36% |
| WUNDER_INFLAMMATORY_RESPONSE_AND_CHOLESTEROL_UP                              | 20   | 0.571 | 1.653 | 0.003     | 0.146     | 1          | 1152        | tags=30%, list=16%, signal=35% |
| GO_SINGLE_STRANDED_DNA_BINDING                                               | 21   | 0.550 | 1.630 | 0.017     | 0.172     | 1          | 785         | tags=33%, list=11%, signal=37% |
| GO_MULTI_ORGANISM_REPRODUCTIVE_PROCESS                                       | 312  | 0.361 | 1.626 | 0         | 0.175     | 1          | 1440        | tags=29%, list=20%, signal=35% |
| GO_REGULATION_OF_CILIUM_ASSEMBLY                                             | 17   | 0.567 | 1.616 | 0.019     | 0.188     | 1          | 865         | tags=53%, list=12%, signal=60% |
| RODRIGUES_THYROID_CARINOMA_ANAPLASTIC_UP                                     | 218  | 0.369 | 1.605 | 0         | 0.207     | 1          | 1764        | tags=34%, list=24%, signal=43% |
| GO_INNATE_IMMUNE_RESPONSE_ACTIVATING_CELL_SURFACE_RECEPTOR_SIGNALING_PATHWAY | 23   | 0.527 | 1.600 | 0.021     | 0.216     | 1          | 1425        | tags=57%, list=19%, signal=70% |
| GO_FERTILIZATION                                                             | 39   | 0.470 | 1.592 | 0.016     | 0.225     | 1          | 1522        | tags=36%, list=21%, signal=45% |
| HAMAI_APOPTOSIS_VIA_TRAIL_UP                                                 | 214  | 0.362 | 1.587 | 0.002     | 0.228     | 1          | 1706        | tags=34%, list=23%, signal=43% |
| GO_MITOTIC_SPINDLE_ASSEMBLY                                                  | 15   | 0.581 | 1.581 | 0.028     | 0.239     | 1          | 1014        | tags=40%, list=14%, signal=46% |

Supplementary file 6, part 1, most related gene sets the expression of which enriched along with the expression of IL7.

Columns: Size: Number of genes in the gene set that included in the expression matrix; ES: enrichment score; NES: Normalized enrichment score; NOM p-value: Nominal p-value; FDR q-value: False discovery rate; FWER p-value: Familywise-error rate; RANK AT MAX: The position in the ranked list at which the maximum enrichment score occurred; LEADING EDGE: three statistics used to define the leading-edge subsets (<https://www.gsea-msigdb.org/gsea/doc/GSEASUserGuideFrame.html>).

| Gene Set                                                                       | SIZE | ES     | NES    | NOM   |           | FWER p-<br>val | RANK<br>AT MAX | LEADING EDGE                    |
|--------------------------------------------------------------------------------|------|--------|--------|-------|-----------|----------------|----------------|---------------------------------|
|                                                                                |      |        |        | p-val | FDR q-val |                |                |                                 |
| GO_ENDOTHELIAL_CELL_MIGRATION                                                  | 99   | -0.503 | -2.384 | 0     | 0         | 0              | 1809           | tags=46%, list=25%, signal=61%  |
| GO_BLOOD_VESSEL_ENDOTHELIAL_CELL_MIGRATION                                     | 52   | -0.559 | -2.286 | 0     | 5.27E-04  | 0.01           | 1745           | tags=52%, list=24%, signal=68%  |
| GO_REGULATION_OF_ENDOTHELIAL_CELL_MIGRATION                                    | 78   | -0.496 | -2.229 | 0     | 1.15E-03  | 0.032          | 1809           | tags=47%, list=25%, signal=62%  |
| BENPORATH_MYC_TARGETS_WITH_EBOX                                                | 74   | -0.484 | -2.139 | 0     | 0.003     | 0.135          | 1247           | tags=39%, list=17%, signal=47%  |
| GO_REGULATION_OF_CELLULAR_RESPONSE_TO_GROWTH_FACTOR_STIMULUS                   | 111  | -0.440 | -2.085 | 0     | 0.005     | 0.249          | 2350           | tags=54%, list=32%, signal=78%  |
| GO_EXTRACELLULAR_STRUCTURE_ORGANIZATION                                        | 219  | -0.396 | -2.067 | 0     | 0.006     | 0.303          | 2082           | tags=44%, list=28%, signal=60%  |
| GSE1432_6H_VS_24H_IFNG_MICROGLIA_UP                                            | 79   | -0.467 | -2.067 | 0     | 0.006     | 0.305          | 1502           | tags=41%, list=20%, signal=50%  |
| GO_TISSUE_MIGRATION                                                            | 145  | -0.408 | -2.026 | 0     | 0.008     | 0.449          | 1828           | tags=41%, list=25%, signal=54%  |
| GO_COLLAGEN_CONTAINING_EXTRACELLULAR_MATRIX                                    | 197  | -0.391 | -2.012 | 0     | 0.008     | 0.505          | 1934           | tags=43%, list=26%, signal=56%  |
| GO_REGULATION_OF_ENDOTHELIAL_CELL_DIFFERENTIATION                              | 16   | -0.667 | -2.000 | 0.002 | 0.009     | 0.554          | 580            | tags=50%, list=8%, signal=54%   |
| HAMAI_APOPTOSIS_VIA_TRAIL_DN                                                   | 81   | -0.446 | -1.999 | 0     | 0.009     | 0.557          | 1798           | tags=42%, list=25%, signal=55%  |
| REACTOME_EXTRACELLULAR_MATRIX_ORGANIZATION                                     | 162  | -0.395 | -1.980 | 0     | 0.010     | 0.655          | 2349           | tags=52%, list=32%, signal=76%  |
| GO_AMEBOIDAL_TYPE_CELL_MIGRATION                                               | 191  | -0.379 | -1.973 | 0     | 0.010     | 0.687          | 2006           | tags=42%, list=27%, signal=57%  |
| ROY_WOUND_BLOOD_VESSEL_UP                                                      | 30   | -0.542 | -1.972 | 0     | 0.010     | 0.689          | 2337           | tags=60%, list=32%, signal=88%  |
| GO_CELL_MIGRATION_INVOLVED_IN_SPROUTING_ANGIOGENESIS                           | 31   | -0.535 | -1.933 | 0     | 0.013     | 0.826          | 1619           | tags=45%, list=22%, signal=58%  |
| GO_REGULATION_OF_CELL_MIGRATION_INVOLVED_IN_SPROUTING_ANGIOGENESIS             | 22   | -0.580 | -1.932 | 0.003 | 0.014     | 0.834          | 1619           | tags=55%, list=22%, signal=70%  |
| GO_POSITIVE_REGULATION_OF_BLOOD_VESSEL_ENDOTHELIAL_CELL_MIGRATION              | 21   | -0.590 | -1.929 | 0     | 0.014     | 0.84           | 2279           | tags=67%, list=31%, signal=96%  |
| KEGG_ECM_RECEPTOR_INTERACTION                                                  | 48   | -0.474 | -1.929 | 0     | 0.014     | 0.84           | 2316           | tags=60%, list=32%, signal=88%  |
| GO_EXTRACELLULAR_MATRIX_STRUCTURAL_CONSTITUENT                                 | 89   | -0.420 | -1.927 | 0     | 0.014     | 0.847          | 2645           | tags=64%, list=36%, signal=99%  |
| GO_ROUGH_ENDOPLASMIC_RETICULUM                                                 | 26   | -0.554 | -1.919 | 0.006 | 0.014     | 0.866          | 1651           | tags=58%, list=23%, signal=74%  |
| GO_T_CELL_MEDIATED_IMMUNITY                                                    | 34   | -0.519 | -1.899 | 0     | 0.016     | 0.922          | 1455           | tags=41%, list=20%, signal=51%  |
| GO_REGULATION_OF_EXTRACELLULAR_MATRIX_ORGANIZATION                             | 18   | -0.600 | -1.889 | 0     | 0.017     | 0.946          | 1518           | tags=50%, list=21%, signal=63%  |
| GO_REGULATION_OF_VASCULAR_ENDOTHELIAL_GROWTH_FACTOR_RECEPTOR_SIGNALING_PATHWAY | 16   | -0.614 | -1.884 | 0.003 | 0.017     | 0.95           | 2350           | tags=69%, list=32%, signal=101% |
| GO_ENDOTHELIUM_DEVELOPMENT                                                     | 54   | -0.450 | -1.853 | 0     | 0.021     | 0.983          | 957            | tags=33%, list=13%, signal=38%  |
| GO_REGULATION_OF_STEROID_BIOSYNTHETIC_PROCESS                                  | 37   | -0.492 | -1.852 | 0.003 | 0.021     | 0.983          | 1805           | tags=51%, list=25%, signal=68%  |
| GO_LATE_ENDOSOME_MEMBRANE                                                      | 44   | -0.478 | -1.852 | 0     | 0.021     | 0.983          | 971            | tags=34%, list=13%, signal=39%  |
| GO_EXTRACELLULAR_MATRIX_COMPONENT                                              | 29   | -0.521 | -1.847 | 0     | 0.022     | 0.984          | 2645           | tags=79%, list=36%, signal=124% |
| GO_EXTRACELLULAR_MATRIX                                                        | 254  | -0.345 | -1.844 | 0     | 0.022     | 0.986          | 1934           | tags=38%, list=26%, signal=50%  |
| GO_EXTRACELLULAR_MATRIX_BINDING                                                | 31   | -0.505 | -1.831 | 0     | 0.024     | 0.99           | 2341           | tags=61%, list=32%, signal=90%  |
| GO_ACTIVATION_OF_MAPKK_ACTIVITY                                                | 21   | -0.560 | -1.819 | 0.003 | 0.026     | 0.998          | 2304           | tags=62%, list=31%, signal=90%  |

| Gene Set                                                                       | SIZE | ES     | NES    | NOM<br>p-val | FDR q-val | FWER p-<br>val | RANK<br>AT MAX | LEADING EDGE                    |
|--------------------------------------------------------------------------------|------|--------|--------|--------------|-----------|----------------|----------------|---------------------------------|
| SWEET_LUNG_CANCER_KRAS_DN                                                      | 227  | -0.342 | -1.787 | 0            | 0.031     | 1              | 2099           | tags=47%, list=29%, signal=63%  |
| GO_T_CELL_MEDIATED_CYTOTOXICITY                                                | 17   | -0.544 | -1.682 | 0.016        | 0.050     | 1              | 1437           | tags=47%, list=20%, signal=58%  |
| REACTOME_INTERLEUKIN_1_SIGNALING                                               | 18   | -0.541 | -1.668 | 0.018        | 0.053     | 1              | 779            | tags=33%, list=11%, signal=37%  |
| JECHLINGER_EPITHELIAL_TO_MESENCHYMAL_TRANSITION_UP                             | 30   | -0.464 | -1.668 | 0.011        | 0.053     | 1              | 2316           | tags=60%, list=32%, signal=87%  |
| GO_NEGATIVE_REGULATION_OF_EPITHELIAL_CELL_DIFFERENTIATION                      | 16   | -0.555 | -1.663 | 0.013        | 0.054     | 1              | 1113           | tags=38%, list=15%, signal=44%  |
| GO_WOUND_HEALING                                                               | 217  | -0.323 | -1.646 | 0            | 0.060     | 1              | 2040           | tags=41%, list=28%, signal=55%  |
| GO_EPITHELIAL_CELL_APOPTOTIC_PROCESS                                           | 42   | -0.425 | -1.637 | 0.003        | 0.062     | 1              | 1626           | tags=45%, list=22%, signal=58%  |
| GO_POSITIVE_REGULATION_OF_ENDOTHELIAL_CELL_PROLIFERATION                       | 49   | -0.396 | -1.583 | 0.007        | 0.076     | 1              | 2651           | tags=53%, list=36%, signal=83%  |
| GO_REGULATION_OF_T_CELL_MEDIATED_IMMUNITY                                      | 22   | -0.476 | -1.583 | 0.016        | 0.076     | 1              | 1455           | tags=36%, list=20%, signal=45%  |
| GO_MYELOID_LEUKOCYTE_MEDIATED_IMMUNITY                                         | 174  | -0.314 | -1.580 | 0            | 0.077     | 1              | 1825           | tags=37%, list=25%, signal=48%  |
| GO_POSITIVE_REGULATION_OF_TYPE_I_INTERFERON_PRODUCTION                         | 20   | -0.475 | -1.543 | 0.035        | 0.090     | 1              | 633            | tags=20%, list=9%, signal=22%   |
| GO_ENDOTHELIAL_CELL_APOPTOTIC_PROCESS                                          | 28   | -0.430 | -1.523 | 0.043        | 0.098     | 1              | 1626           | tags=46%, list=22%, signal=59%  |
| REACTOME_INTERLEUKIN_1_FAMILY_SIGNALING                                        | 28   | -0.413 | -1.475 | 0.028        | 0.121     | 1              | 1437           | tags=29%, list=20%, signal=35%  |
| GO_VASCULAR_ENDOTHELIAL_GROWTH_FACTOR_SIGNALING_PATHWAY                        | 21   | -0.446 | -1.466 | 0.034        | 0.125     | 1              | 2634           | tags=67%, list=36%, signal=104% |
| GO_POSITIVE_REGULATION_OF_TUMOR_NECROSIS_FACTOR_SUPERFAMILY_CYTOKINE_PRODUCION | 27   | -0.416 | -1.451 | 0.037        | 0.132     | 1              | 1437           | tags=33%, list=20%, signal=41%  |
| GO_CELLULAR_RESPONSE_TO_VASCULAR_ENDOTHELIAL_GROWTH_FACTOR_STIMULUS            | 28   | -0.420 | -1.450 | 0.043        | 0.132     | 1              | 2267           | tags=57%, list=31%, signal=82%  |
| GO_NEGATIVE_REGULATION_OF_EPITHELIAL_CELL_APOPTOTIC_PROCESS                    | 18   | -0.463 | -1.450 | 0.08         | 0.132     | 1              | 2252           | tags=56%, list=31%, signal=80%  |
| GO_VASCULOGENESIS                                                              | 35   | -0.386 | -1.449 | 0.038        | 0.132     | 1              | 1944           | tags=46%, list=27%, signal=62%  |
| GO_APOPTOTIC_CELL_CLEARANCE                                                    | 17   | -0.457 | -1.402 | 0.084        | 0.157     | 1              | 1670           | tags=41%, list=23%, signal=53%  |
| REACTOME_SIGNALING_BY_NON_RECEPTOR_TYROSINE_KINASES                            | 20   | -0.437 | -1.400 | 0.081        | 0.158     | 1              | 1725           | tags=45%, list=24%, signal=59%  |
| GSE8678_IL7R_LOW_VS_HIGH_EFF_CD8_TCELL_UP                                      | 81   | -0.314 | -1.388 | 0.035        | 0.166     | 1              | 1102           | tags=30%, list=15%, signal=34%  |
| GO_REGULATION_OF_CYTOKINE_PRODUCTION_INVOLVED_IN_IMMUNE_RESPONSE               | 28   | -0.387 | -1.359 | 0.1          | 0.185     | 1              | 2122           | tags=43%, list=29%, signal=60%  |
| REACTOME_CELL_DEATH_SIGNALLING_VIA_NRAGE_NRIF_AND_NADE                         | 29   | -0.378 | -1.357 | 0.087        | 0.186     | 1              | 2134           | tags=55%, list=29%, signal=78%  |
| GO_LEUKOCYTE_MEDIATED_IMMUNITY                                                 | 344  | -0.251 | -1.357 | 0.011        | 0.186     | 1              | 1648           | tags=24%, list=22%, signal=29%  |
| KEGG_SMALL_CELL_LUNG_CANCER                                                    | 27   | -0.380 | -1.355 | 0.067        | 0.188     | 1              | 2320           | tags=48%, list=32%, signal=70%  |
| REACTOME_PROGRAMMED_CELL_DEATH                                                 | 40   | -0.355 | -1.355 | 0.09         | 0.188     | 1              | 1900           | tags=45%, list=26%, signal=60%  |
| GO_POSITIVE_REGULATION_OF_CELL_DEATH                                           | 266  | -0.256 | -1.352 | 0            | 0.190     | 1              | 2052           | tags=37%, list=28%, signal=49%  |
| GO_POSITIVE_REGULATION_OF_T_CELL_MEDIATED_IMMUNITY                             | 15   | -0.460 | -1.348 | 0.112        | 0.193     | 1              | 2122           | tags=47%, list=29%, signal=66%  |
| ZWANG_EGF_INTERVAL_DN                                                          | 97   | -0.287 | -1.342 | 0.02         | 0.198     | 1              | 2152           | tags=42%, list=29%, signal=59%  |
| GSE2197_IMMUNOSUPPRESSIVE_DNA_VS_UNTREATEDIN_DC_DN                             | 67   | -0.310 | -1.339 | 0.055        | 0.200     | 1              | 1435           | tags=31%, list=20%, signal=39%  |

| Gene Set                                                                   | SIZE | ES     | NES    | NOM p-val | FDR q-val | FWER p-val | RANK AT MAX | LEADING EDGE                    |
|----------------------------------------------------------------------------|------|--------|--------|-----------|-----------|------------|-------------|---------------------------------|
| GO_EXTRACELLULAR_MATRIX_STRUCTURAL_CONSTITUENT_CONFERRING_TENSILE_STRENGTH | 29   | -0.381 | -1.332 | 0.095     | 0.206     | 1          | 2034        | tags=52%, list=28%, signal=71%  |
| REACTOME_DEATH_RECEPTOR_SIGNALLING                                         | 51   | -0.329 | -1.329 | 0.077     | 0.208     | 1          | 2134        | tags=49%, list=29%, signal=69%  |
| GSE44955_MCSF_VS_MCSF_AND_IL27_STIM_MACROPHAGE_UP                          | 76   | -0.300 | -1.327 | 0.032     | 0.210     | 1          | 1859        | tags=38%, list=25%, signal=51%  |
| GSE13229_IMM_VS_MATURE_NKCELL_DN                                           | 71   | -0.312 | -1.327 | 0.049     | 0.210     | 1          | 851         | tags=24%, list=12%, signal=27%  |
| GO_LEUKOCYTE_MEDIATED_CYTOTOXICITY                                         | 41   | -0.339 | -1.323 | 0.079     | 0.213     | 1          | 2224        | tags=44%, list=30%, signal=63%  |
| GSE43955_TH0_VS_TGFB_IL6_TH17_ACT_CD4_TCELL_52H_UP                         | 78   | -0.298 | -1.321 | 0.033     | 0.215     | 1          | 1564        | tags=31%, list=21%, signal=39%  |
| GO_POSITIVE_REGULATION_OF_INTERLEUKIN_6_PRODUCTION                         | 31   | -0.369 | -1.317 | 0.101     | 0.218     | 1          | 1853        | tags=35%, list=25%, signal=47%  |
| YU_MYC_TARGETS_DN                                                          | 29   | -0.370 | -1.311 | 0.105     | 0.223     | 1          | 1313        | tags=28%, list=18%, signal=33%  |
| GO_REGULATION_OF_PRODUCTION_OF_MOLECULAR_MEDIATOR_OF_IMMUNE_RESPONSE       | 45   | -0.323 | -1.302 | 0.085     | 0.231     | 1          | 1825        | tags=33%, list=25%, signal=44%  |
| PID_TGFBR_PATHWAY                                                          | 22   | -0.398 | -1.293 | 0.16      | 0.238     | 1          | 2651        | tags=50%, list=36%, signal=78%  |
| GSE43955_TH0_VS_TGFB_IL6_TH17_ACT_CD4_TCELL_1H_DN                          | 70   | -0.297 | -1.293 | 0.063     | 0.238     | 1          | 1585        | tags=34%, list=22%, signal=43%  |
| GSE3920_IFNA_VS_IFNG_TREATED_FIBROBLAST_DN                                 | 82   | -0.289 | -1.291 | 0.08      | 0.239     | 1          | 2077        | tags=45%, list=28%, signal=62%  |
| GO_POSITIVE_REGULATION_OF_WOUND_HEALING                                    | 22   | -0.385 | -1.291 | 0.134     | 0.240     | 1          | 2012        | tags=50%, list=27%, signal=69%  |
| GO_INTRINSIC_APOPTOTIC_SIGNALING_PATHWAY                                   | 95   | -0.277 | -1.285 | 0.045     | 0.245     | 1          | 1410        | tags=28%, list=19%, signal=35%  |
| GO_POSITIVE_REGULATION_OF_CELL_MATRIX_ADHESION                             | 26   | -0.377 | -1.285 | 0.141     | 0.245     | 1          | 2681        | tags=65%, list=37%, signal=103% |
| GSE9601_NFKB_INHIBITOR_VS_PI3K_INHIBITOR_TREATED_HCMV_INF_MONOCYTE_UP      | 80   | -0.289 | -1.285 | 0.062     | 0.245     | 1          | 1672        | tags=34%, list=23%, signal=43%  |
| GSE27786_BCELL_VS_MONO_MAC_DN                                              | 80   | -0.296 | -1.285 | 0.077     | 0.245     | 1          | 2025        | tags=43%, list=28%, signal=58%  |
| GSE22601_DOUBLE_NEGATIVE_VS_DOUBLE_POSITIVE_THYMOCYTE_DN                   | 71   | -0.294 | -1.285 | 0.073     | 0.245     | 1          | 1437        | tags=25%, list=20%, signal=31%  |
| GSE27786_CD8_TCELL_VS_NKCELL_DN                                            | 76   | -0.298 | -1.285 | 0.058     | 0.245     | 1          | 2278        | tags=51%, list=31%, signal=74%  |
| GSE22025_UNTREATED_VS_TGFB1_AND_PROGESTERONE_TREATED_CD4_TCELL_UP          | 87   | -0.278 | -1.284 | 0.058     | 0.246     | 1          | 1987        | tags=39%, list=27%, signal=53%  |
| GSE1925_CTRL_VS_3H_IFNG_STIM_MACROPHAGE_UP                                 | 61   | -0.304 | -1.284 | 0.108     | 0.246     | 1          | 1695        | tags=31%, list=23%, signal=40%  |
| GO_REGULATION_OF_EPITHELIAL_TO_MESENCHYMAL_TRANSITION                      | 43   | -0.326 | -1.283 | 0.103     | 0.247     | 1          | 1388        | tags=30%, list=19%, signal=37%  |

Supplementary file 6, part 2, most related gene sets expression of which reduced along with the expression of IL7.

Columns: Size: Number of genes in the gene set that included in the expression matrix; ES: enrichment score; NES: Normalized enrichment score; NOM p-value: Nominal p-value; FDR q-value: False discovery rate; FWER p-value: Familywise-error rate; RANK AT MAX: The position in the ranked list at which the maximum enrichment score occurred; LEADING EDGE: three statistics used to define the leading-edge subsets (<https://www.gsea-msigdb.org/gsea/doc/GSEAUUserGuideFrame.html>).
